1 ***De novo* assembly and phasing of dikaryotic genomes from two isolates of *Puccinia***  
2 ***coronata* f. sp. *avenae*, the causal agent of oat crown rust**

3 Marisa E. Miller<sup>a</sup>, Ying Zhang<sup>b</sup>, Vahid Omidvar<sup>a</sup>, Jana Sperschneider<sup>c</sup>, Benjamin Schwessinger<sup>d</sup>,  
4 Castle Raley<sup>e</sup>, Jonathan M. Palmer<sup>f</sup>, Diana Garnica<sup>g</sup>, Narayana Upadhyaya<sup>h</sup>, John Rathjen<sup>d</sup>,  
5 Jennifer M. Taylor<sup>g</sup>, Robert F. Park<sup>h</sup>, Peter N. Dodds<sup>g</sup>, Cory D. Hirsch<sup>a</sup>, Shahryar F. Kianian<sup>a,i,\*</sup>,  
6 Melania Figueroa<sup>a,j\*</sup>

7 Department of Plant Pathology, University of Minnesota, St. Paul, MN, USA<sup>a</sup>; Supercomputing  
8 Institute for Advanced Computational Research, University of Minnesota, Minneapolis, MN,  
9 USA<sup>b</sup>; Centre for Environment and Life Sciences, Commonwealth Scientific and Industrial  
10 Research Organisation, Agriculture and Food, Perth, WA, Australia<sup>c</sup>; Research School of  
11 Biology, Australian National University, Canberra, ACT, Australia<sup>d</sup>; Leidos Biomedical  
12 Research, MD, USA<sup>e</sup>; Center for Forest Mycology Research, Northern Research Station, USDA  
13 Forest Service, Madison, WI<sup>f</sup>; Agriculture and Food, Commonwealth Scientific and Industrial  
14 Research Organisation, Canberra, ACT, Australia<sup>g</sup>; Plant Breeding Institute, Faculty of  
15 Agriculture and Environment, School of Life and Environmental Sciences, The University of  
16 Sydney, Narellan, NSW, Australia<sup>h</sup>; USDA-ARS Cereal Disease Laboratory, St. Paul, MN,  
17 USA<sup>i</sup>; Stakman-Borlaug Center for Sustainable Plant Health, University of Minnesota, St. Paul,  
18 MN, USA<sup>j</sup>

19 Running head: Haplotype-phasing of the dikaryotic genome of the oat crown rust fungus

20 \*Address correspondence to Melania Figueroa ([figue031@umn.edu](mailto:figue031@umn.edu), +1 (612) 624-2291) and  
21 Shahryar F. Kianian ([shahryar.kianian@ars.usda.gov](mailto:shahryar.kianian@ars.usda.gov), +1 (612) 624-4155)

22 Word count for abstract: 348

23 Word count for text (excluding references, table footnotes, and figure legends): 7,321

24

25 **Abstract**

26 Oat crown rust, caused by the fungus *Puccinia coronata* f. sp. *avenae* (*Pca*), is a devastating  
27 disease that impacts worldwide oat production. For much of its life cycle, *Pca* is dikaryotic, with  
28 two separate haploid nuclei that may vary in virulence genotype, highlighting the importance of  
29 understanding haplotype diversity in this species. We generated highly contiguous *de novo*  
30 genome assemblies of two *Pca* isolates, 12SD80 and 12NC29, from long-read sequences. In  
31 total, we assembled 603 primary contigs for a total assembly length of 99.16 Mbp for 12SD80  
32 and 777 primary contigs with a total length of 105.25 Mbp for 12NC29, and approximately 52%  
33 of each genome was assembled into alternate haplotypes. This revealed structural variation  
34 between haplotypes in each isolate equivalent to more than 2% of the genome size, in addition to  
35 about 260,000 and 380,000 heterozygous single-nucleotide polymorphisms in 12SD80 and  
36 12NC29, respectively. Transcript-based annotation identified 26,796 and 28,801 coding  
37 sequences for isolates 12SD80 and 12NC29, respectively, including about 7,000 allele pairs in  
38 haplotype-phased regions. Furthermore, expression profiling revealed clusters of co-expressed  
39 secreted effector candidates, and the majority of orthologous effectors between isolates showed  
40 conservation of expression patterns. However, a small subset of orthologs showed divergence in  
41 expression, which may contribute to differences in virulence between 12SD80 and 12NC29. This  
42 study provides the first haplotype-phased reference genome for a dikaryotic rust fungus as a  
43 foundation for future studies into virulence mechanisms in *Pca*.

44

45

46 **Importance**

47 Disease management strategies for oat crown rust are challenged by the rapid evolution of  
48 *Puccinia coronata* f. sp. *avenae* (*Pca*), which renders resistance genes in oat varieties ineffective.  
49 Despite the economic importance of understanding *Pca*, resources to study the molecular  
50 mechanisms underpinning pathogenicity and emergence of new virulence traits are lacking. Such  
51 limitations are partly due to the obligate biotrophic lifestyle of *Pca* as well as the dikaryotic  
52 nature of the genome, features that are also shared with other important rust pathogens. This  
53 study reports the first release of a haplotype-phased genome assembly for a dikaryotic fungal  
54 species and demonstrates the amenability of using emerging technologies to investigate genetic  
55 diversity in populations of *Pca*.

56 **Keywords:** rust fungi, genome, oat, virulence, effectors

57

58

## 59 **Introduction**

60 Cultivated oat (*Avena sativa*) ranks sixth in global production among cereals like maize,  
61 rice, and wheat (1). In recent years, the demonstrated health benefits of oats and its expanded  
62 commercial applications have increased demand for the crop (2). Crown rust, caused by the  
63 pathogenic fungus *Puccinia coronata* f. sp. *avenae* (*Pca*), is the most devastating disease  
64 affecting production in nearly every oat growing region worldwide (2, 3) with yield losses due to  
65 infection reaching 50% (4).

66 *Pca* is a macrocyclic and heteroecious rust fungus (Puccinales, Basidiomycota) (2).  
67 Asexual or clonal reproduction of *Pca* occurs in oat, and its wild relatives, and involves repeated  
68 infection cycles mediated by urediniospores, which can perpetuate infection indefinitely (2). The  
69 infection process involves germination of urediniospores on the leaf surface, appressorium and  
70 penetration peg differentiation to allow host entry through a stomate, formation of a substomatal  
71 vesicle and the establishment of a colony by hyphal proliferation, and finally sporulation to  
72 produce more urediniospores. During infection, the fungus also forms haustoria, specialized  
73 feeding structures that allow nutrient uptake and secretion of effector proteins into the host cells  
74 (5). During the asexual cycle, *Pca* is dikaryotic, with each urediniospore containing two haploid  
75 nuclei, while the sexual cycle involves meiosis and infection of an alternate host of the genus  
76 *Rhamnus* (e.g. common buckthorn) by haploid spores and subsequent gamete fusion to re-  
77 establish the dikaryotic stage (2). Thus, the sexual cycle contributes to oat crown rust outbreaks  
78 both by generating an additional source of inoculum and by re-assorting genetic variation in the  
79 pathogen population.

80 Disease management strategies for oat crown rust rely heavily on breeding for race-

81 specific resistance (2). However, *Pca* rapidly evolves virulence to new resistance genes and field  
82 populations are highly polymorphic with high numbers of races (pathotypes), which limits the  
83 efficacy of this approach (6). Resistance to *Pca* in *Avena* spp. conforms to the classical gene-for-  
84 gene model (7, 8), and is conditioned by dominant resistance (*R*) genes, which mediate  
85 recognition of cognate avirulence (*Avr*) factors in the pathogen. Plant *R* genes typically encode  
86 intracellular nucleotide binding and leucine-rich repeat (NLR) receptor proteins, which detect  
87 specific pathogen effector proteins and induce a localized hypersensitive response (9, 10).  
88 Evolution of new virulence traits occur due to changes in effector genes that allow the pathogen  
89 to escape recognition (11). Several *Avr* genes identified in the model flax rust, *Melampsora lini*,  
90 encode secreted proteins expressed in haustoria that are recognized inside host cells (12, 13).  
91 However, no *Avr* genes have been identified in *Pca* and the biological mechanisms generating  
92 genetic variability in *Pca* are unknown. Since *Pca* is dikaryotic, a virulence phenotype requires  
93 the loss of avirulence function of both alleles at the effector locus and thus emergence of  
94 virulence strains can be enhanced by sexual recombination. Nevertheless, the high diversity of  
95 virulence phenotypes in asexual populations suggests that additional molecular mechanisms like  
96 high mutational rates, somatic hybridization and somatic recombination play roles in generating  
97 variability in *Pca* (14-16).

98         Given their biotrophic lifestyle, most rust fungi are recalcitrant to *in vitro* culturing and  
99 genetic transformation, which hinders molecular studies of pathogenicity. Nevertheless, genome  
100 sequencing of a few rust species has provided insights into the biology and adaptations  
101 associated with parasitic growth (17-24). These resources have enabled the prediction of effector  
102 candidates and, in some instances, identification of *Avr* genes (13, 25). However, the large

103 genome sizes of rust fungi sequenced to date (90-200 Mbp) compared to other pathogenic fungi  
104 (26-29), and high repetitive DNA content (over 50%) hamper *de novo* genome assembly from  
105 short-read sequencing, which leads to high fragmentation, mis-assembly errors and merging of  
106 two distinct haplotype sequences. The dikaryotic nature of rust fungi also means that current  
107 genome assemblies represent collapsed mosaics of sequences derived from both haplotypes and  
108 do not account for structural variation between haplotypes. Single-molecule real time (SMRT)  
109 sequencing has emerged as a powerful technology to achieve high-contiguity assembly of even  
110 repeat-rich genomes (30) and recently released algorithms enable the resolution of haplotypes in  
111 diploid genomes (31).

112 Here, we document the assembly of draft genome sequences for two *Pca* isolates with  
113 contrasting virulence phenotypes using SMRT sequencing and the FALCON assembler and  
114 FALCON-Unzip for haplotype resolution (31). The contiguity of the *Pca* assemblies is greatly  
115 improved compared to previous short-read *de novo* assemblies of rust species (20-22). We  
116 separately assembled the two haplotypes for over 50% of the haploid genome of each isolate.  
117 This revealed many structural differences between haplotypes and isolates, including large  
118 insertions/deletions covering both intergenic and coding regions. The *Pca* genomes were  
119 annotated utilizing expression data from different tissue types and life stages and a catalog of  
120 predicted secreted effectors was generated. To our knowledge, this study provides the first report  
121 of genome-wide haplotype resolution of dikaryotic rust fungi and the foundation to investigate  
122 the evolution of virulence factors and the contribution of haplotype variation to the pathogenicity  
123 of *Pca*.

124 **Results and discussion**

125 ***Puccinia coronata* f. sp. *avenae* (*Pca*) isolates 12SD80 and 12NC29 show distinct virulence**  
126 **profiles.** To build comprehensive genomic resources for virulence studies in *Pca* we selected  
127 two isolates, 12NC29 and 12SD80, from the 2012 USDA-ARS annual rust survey that show  
128 contrasting virulence profiles on an oat differential set (**Figure 1A and B**). Isolate 12SD80 is  
129 virulent on a broader range of oat differentials than isolate 12NC29, although recently released  
130 *Pc* resistance genes (*Pc91*, *Pc94*, *Pc96*) are effective against both isolates. Despite the different  
131 virulence profiles on specific *Pc* genes, both isolates showed similar infection progression over a  
132 seven-day time course on the susceptible oat variety Marvelous (**Figure 1C**). More than 90% of  
133 urediniospores germinated of which more than 60% differentiated an appressorium (penetration  
134 structure) in the first 24 hours of infection. Established colonies and first signs of sporulation  
135 were detected by 5 days post infection (dpi) and 40-50% of infection sites displayed sporulation  
136 by 7 dpi. Thus, both *Pca* isolates were equally aggressive in the absence of effective *Pc* genes.

137 ***De novo* genome assembly and haplotype-phasing of *Pca* isolates.** High molecular weight  
138 DNA (>50 kbp) was extracted from germinated urediniospores of 12SD80 and 12NC29, and  
139 long-read sequence data was generated using SMRT sequencing. This yielded approximately  
140 20.9 and 25.9 Gbp of filtered subreads for 12SD80 and 12NC29, respectively. The mean and  
141 N50 subread lengths were 6,389 and 8,445 bp, respectively, for 12SD80, and 6,481 and 8,609 bp  
142 for 12NC29 (**Table S1** and **Figure S1**). Subread distributions for both isolates extended to  
143 approximately 30,000 bp (**Figure S1**). Illumina sequencing was performed on the same samples  
144 and yielded approximately 6 and 7 Gbp of sequence information for 12SD80 and 12NC29,  
145 respectively.

146           Given that *Pca* urediniospores are dikaryotic, the diploid aware assembler FALCON in  
147 combination with FALCON-Unzip (31) was used to first assemble the genomes of 12NC29 and  
148 12SD80 and then distinguish regions of homology and divergence between haplotypes.  
149 Homologous regions were collapsed during FALCON assembly and are referred to as primary  
150 contigs, whereas divergent regions between haplotypes were assembled into haplotigs by  
151 FALCON-Unzip. As such, the primary contigs should contain the equivalent of one haploid  
152 genome and haplotigs represent the total sequence placed in alternate assembly paths relative to  
153 each individual primary contigs (**Figure 2A**). Genome assembly of 12SD80 resulted in 603  
154 primary contigs with a total size of 99.2 Mbp and a contig N50 of 268.3 kbp, while 777 primary  
155 contigs with a total size of 105.2 Mbp and a contig N50 of 217.3 kbp were assembled for  
156 12NC29 (**Table 1**). These assemblies demonstrate the advantage of long-read assembly to  
157 improve contiguity compared to previous short-read assemblies of other rust species. For  
158 example, the wheat stripe rust fungus, *Puccinia striiformis* f. sp. *tritici* (*Pst*), genome assembly  
159 contained more than 29,000 contigs with an N50 of 5.1 kbp (19) and the flax rust fungus,  
160 *Melampsora lini* (*MI*), assembly has 21,000 scaffolds with an N50 of 31 kbp (22). The contiguity  
161 of our *Pca* genome assemblies are comparable to the scaffolding efficiency of the large insert  
162 Sanger sequence-based assemblies of the poplar rust fungus, *Melampsora larici-populina* (*Mlp*),  
163 and the wheat stem rust fungus, *Puccinia graminis* f. sp. *tritici* (*Pgt*), which contained 462 and  
164 392 scaffolds, respectively (17). However, the *Mlp* and *Pgt* scaffolds contain approximately 3.5  
165 and 7 Mbp of missing data, respectively, as gaps between contigs. The estimated genome sizes of  
166 12SD80 and 12NC29 are in the range of other related rusts such as *Pgt* (92 Mbp) (17, 18) and  
167 *Pst* (65-130 Mbp) (19, 21, 24) and in agreement with nuclear DNA fluorescence intensity  
168 measurements of haploid pycniospores suggesting about 15% larger genome size of *Pca* relative



169 to *Pgt* (32). Similarly, a preliminary genome assembly of another *Pca* isolate based on Illumina  
170 short-reads suggested a genome size of 110 Mbp (Park *et al.*, unpublished). On the other hand,  
171 Tavares *et al.* (33) reported a haploid genome size of approximately 244 Mbp based on nuclear  
172 fluorescence for a *P. coronata* isolate obtained from *Avena sterilis*. Given the broad host range  
173 of *P. coronata* (2) this isolate may represent a different forma specialis.

174 A total of 1,033 and 950 haplotigs were assembled for 12SD80 and 12NC29,  
175 respectively, comprising 52% of the haploid genome size in each case (**Table 1**). Haplotig  
176 sequences were aligned to primary contigs to identify corresponding regions; illustrated for the  
177 largest primary contig in 12SD80 in **Figure 2A**. Numerous small variants were detected in the  
178 first haplotig-associated region in this primary contig and the corresponding haplotig by  
179 alignment of Illumina DNA reads to primary contigs and haplotigs simultaneously (**Figure 2B**).  
180 The haplotig also contains a tandem repeat expansion relative to the primary contig, while the  
181 flanking collapsed regions in the primary contig are less variable. The variation in this region  
182 likely explains why an alternate path in the assembly graph led to the phasing of this genomic  
183 region. The Illumina read depth (coverage) in the haplotig region is lower relative to the flanking  
184 collapsed regions as is expected considering that haplotig-associated regions represent a single  
185 haplotype, whereas most collapsed regions in primary contigs represent both haplotypes. In  
186 addition, reads in the collapsed region map uniquely in the genome, while those in the haplotig  
187 region map to multiple sites.

188 To validate haplotype phasing more extensively, we calculated genome-wide coverage  
189 for collapsed and haplotig-associated regions within primary contigs, as well as haplotigs.  
190 Haplotigs and haplotig regions of primary contigs in 12SD80 showed tight coverage distribution,

191 with mean coverages of 56.3 and 58.7 respectively, while collapsed regions had a mean coverage  
192 of 103.6, but showed a broader distribution (**Figure 2C**). Regions of primary contigs with lower  
193 coverage but without an associated haplotig may represent locations with complex  
194 rearrangements or very large insertions/deletions between the two haplotypes. This could result  
195 in the presence of haplotype-specific sequences in primary contigs. Additionally, some primary  
196 contigs did not contain any associated haplotigs, which may be because the haplotype sequences  
197 were too divergent and assembled as two separate primary contigs. Consistent with this, primary  
198 contigs without haplotigs showed a lower coverage distribution than those with associated  
199 haplotigs (**Figure 2C**). Similarly, in 12NC29 mean coverages of haplotigs, haplotig regions and  
200 collapsed regions of primary contigs were 62.6, 64.3 and 91.0, respectively (**Figure S2A**). In  
201 12SD80 and 12NC29, there were 176 and 312 primary contigs without haplotigs, respectively,  
202 totaling 11.1 and 17.5 Mbp. If these do represent separately assembled haplotypes, then this may  
203 partly explain the approximately 6 Mbp larger primary contig assembly size for 12NC29. The  
204 ability to phase the genome assembly into primary contigs and haplotigs in this fashion  
205 represents a significant advance to compare haplotype composition in dikaryotic fungi.

206 **Assessment of genome completeness and repetitive DNA content.** To assess the completeness  
207 of the *Pca* genome assemblies, highly conserved fungal genes were mapped in the primary  
208 contigs and haplotigs using BUSCO (34). Approximately 90% of the BUSCO genes were  
209 present as complete sequences and nearly an additional 3% as fragmented copies in the primary  
210 contigs of both genome assemblies (Table 1). One additional BUSCO gene not present in the  
211 primary contigs was found on a haplotig in 12SD80, while no unique BUSCO genes were found  
212 in 12NC29 haplotigs. Fourteen BUSCOs (4.8%) were missing in both isolates, which suggests

213 the presence of difficult to assemble regions in the *Pca* genome. A search for telomere repeat  
214 sequence at the ends of all contigs detected 11 unique telomeres in 12NC29 and 15 in 12SD80,  
215 out of an estimated 16–20 chromosomes (35). Overall, these results indicated that the primary  
216 contigs are a good representation of the core dikaryotic genome of *Pca*.

217 RepeatMasker detected interspersed repeats covering about 53% of the assembled *Pca*  
218 genomes (primary contigs and haplotigs combined; **Table 2**), similar to other rust fungi which  
219 are typically in the range of 35-50% (17, 21, 22). The most prevalent repetitive elements  
220 belonged to the LTR retroelement class (20% of the genome), which was also found to be the  
221 most abundant class in *Pgt* and *Mlp* (17, 24), while DNA elements accounted for about 15% of  
222 the genome. The GC content was approximately 45% for primary contigs and haplotigs in both  
223 *Pca* isolates (**Table 1**), which is consistent with other rust species, such as *Ml* (41%) (22). The  
224 distribution of GC content in individual contigs (**Figure S2B**) did not display a bimodal  
225 distribution which would indicate the presence of AT-rich regions, such as those observed in  
226 fungi that use repeat-induced point mutation (RIP) to inhibit transposon proliferation (36).

227 **Gene annotation and orthology prediction revealed phased allele pairs within isolates and**  
228 **orthologs between isolates.** For each *Pca* isolate, RNAseq reads from germinated spores,  
229 isolated haustoria and infected oat leaves at 2 and 5 dpi (**Table S2**) were pooled and used to  
230 generate both *de novo* and genome-guided transcriptome assemblies using Trinity v2.4.0 (37).  
231 These assemblies were used as transcriptional evidence in the Funannotate pipeline along with  
232 alignment evidence from publicly available EST clusters for Pucciniamycotina species. In total,  
233 17,248 and 17,865 genes were annotated on primary contigs for 12SD80 and 12NC29,  
234 respectively (**Table 3**), which is similar to the haploid gene content of other rust fungal genomes

235 (17, 22). An additional 9,548 and 10,936 genes were annotated on haplotigs for 12SD80 and  
236 12NC29, respectively.

237 To identify putative allele pairs in the phased assemblies, we searched for genes on  
238 primary contigs that had an ortholog present on the corresponding haplotig using Proteinortho  
239 (38) in synteny mode to account for gene order (**Table 3**). A total of 6,664 and 7,789 such allele  
240 pairs were identified in 12SD80 and 12NC29, respectively. About 2,000 haplotype-singletons,  
241 with no orthologs in a corresponding region, were also detected in haplotig-regions of primary  
242 contigs, with a similar number in haplotigs (**Table 3**). These singletons represent haplotype-  
243 specific genes with presence/absence variation or genes with substantial sequence variation that  
244 prevents orthology detection. We also examined gene orthology between isolates, and identified  
245 9,764 orthologous groups (~55% of all genes) containing either: 1) two orthologous genes, one  
246 from each isolate with no allele pairs, 2) an allele pair from one isolate with an unpaired gene  
247 from the other, or 3) two allele pairs, one from each isolate. Isolate-singletons may represent  
248 presence/absence polymorphisms or could be due to sequence divergence or genome  
249 rearrangements preventing orthology detection. Therefore, we examined gene coverage by cross-  
250 mapping Illumina reads from each isolate onto the other assembly (**Figure S3**). The isolate-  
251 singleton genes in 12SD80 and 12NC29 included 558 and 1,174 genes, respectively, with low  
252 coverage (<30X) suggesting they represent presence/absence polymorphisms, while the  
253 remainder showed higher coverage (30 – 200X) indicating that homologs may be present in both  
254 isolates. Taken together, these findings indicate a high level of gene content variation between  
255 haplotypes and isolates of *Pca*. Sequencing a larger sample of *Pca* isolates will help determine  
256 the number of conserved (core) genes versus isolate-specific genes in this species.

257 **Functional annotation of *Pca* genomes.** GO term abundances of annotated genes on primary  
258 contigs and haplotigs combined were very similar between isolates with no significant GO term  
259 enrichments or depletions. Examination of KEGG pathway annotations (39) indicated that, as  
260 observed for other rust fungi (17, 22, 24), the *Pca* genomes lacked nitrate and nitrite assimilation  
261 genes. The assemblies did contain the enzymes glutamine synthetase (K01915), glutamate  
262 synthase (K00264), and glutamate dehydrogenase (K00260), which are putatively involved in  
263 nitrogen assimilation from host-derived amino acids. Enzymes of the sulfate assimilation  
264 pathway were also absent in the two *Pca* isolates. Notably, sulfite reductase was missing from  
265 both assemblies, as was observed for *Pgt* (17). These observations are consistent with the loss of  
266 nitrate, nitrite, and sulfate assimilation pathways associated with the evolution of obligate  
267 biotrophy in rust fungi (17, 22). Most categories of transcription factor families showed low  
268 abundance in both isolates except the CCHC zinc finger class (IPR001878) that has 103  
269 members in 12NC29 and 48 in 12SD80 (**Figure 3A**). This family was also expanded in *Pgt* and  
270 *Mlp* relative to other fungi (17) and are of particular interest as zinc finger TFs are hypothesized  
271 to play roles in effector regulation (40).

272 **Heterozygosity in the dikaryotic genome of *Pca*.** Heterozygous small variants, including  
273 single-nucleotide polymorphisms (SNPs), insertions/deletions (indels) and multiple-nucleotide  
274 polymorphisms (MNPs), were identified by mapping Illumina reads to only primary contigs in  
275 each isolate. We detected 3.45 and 4.60 heterozygous variants/kbp (including 2.68 and 3.62  
276 SNPs/kbp) in 12SD80 and 12NC29, respectively. These heterozygosity rates are in line with  
277 genome-wide estimates of 1-15 hetSNPs/kbp for other *Puccinia* spp. (18, 19, 21, 24), although  
278 such estimates may be influenced by differences in variant calling methods and parameters,

279 residual assembly errors, read length and coverage, and may differ between isolates of a species.  
280 When Illumina reads from 12SD80 were mapped to the 12NC29 primary contig reference, we  
281 detected a total of 3.48 heterozygous and 2.31 homozygous variants/kbp. In the reciprocal  
282 comparison, 5.60 heterozygous and 1.75 homozygous variants/kbp were identified, indicating  
283 substantial variation between isolates as well as between haplotypes.

284 The majority of variants between haplotypes were found in intergenic regions (**Figure**  
285 **S4A**), and these occurred at a higher frequency (3.66 and 4.88 variants/kbp in 12SD80 and  
286 12NC29, respectively) than variants in genic regions (2.86 and 3.76 variants/genic kbp).  
287 Heterozygosity rates were higher in haplotig regions of primary contigs (4.36 and 5.50  
288 variants/kbp in 12SD80 and 12NC29, respectively) than collapsed regions (1.06 and 1.27  
289 variants/kbp). These observations are consistent with haplotigs containing regions of divergence  
290 between haplotypes.

291 We also compared heterozygosity rates in *Pca* and the rust species *Mlp*, *ML*, *Pst*, and *Pt*  
292 using a *k-mer* profile approach based on available Illumina reads with the software  
293 GenomeScope (41). In this analysis, homozygous genomes display a simple Poisson distribution  
294 in the *k-mer* profile plots, whereas heterozygous genomes give a bimodal profile. The *k-mer*  
295 profiles of most of these species (**Figure S5**) showed bimodal profiles, which indicated fairly  
296 heterozygous genomes. This was less apparent for *Pst* and *ML*, which may be explained by the  
297 shorter-read lengths and lower coverage datasets for these species. Heterozygosity levels  
298 calculated in this analysis were similar for all species, but lower than levels detected by SNP  
299 calling.

300 To assess structural variation (SV) between haplotypes we compared haplotigs to their  
301 corresponding aligned regions in primary contigs using Assemblytics, which detects three types

302 of SV: large insertions/deletions; tandem expansions/contractions, which involve tandemly  
303 repeated sequences; and repeat expansions/contractions in which homologous regions are  
304 separated by regions with no homology in each sequence (42). The distributions of these classes  
305 of SV are very similar between the two isolates (**Figure S6**), with insertions/deletions and repeat  
306 expansions/contractions more prevalent than tandem expansions/contractions. Such SV between  
307 50 and 10,000 bp in size represented 2.7% of the primary contig genome size in 12NC29 and  
308 2.1% in 12SD80, and impacted 646 and 951 coding regions on primary contigs in 12SD80 and  
309 12NC29, respectively (**Figure S4B**).

310 **Prediction of secretome and candidate effectors.** Pathogen effectors are secreted proteins that  
311 manipulate host cell processes to facilitate infection, but can also be recognized by host  
312 resistance genes (43). Thus, differences in virulence profiles between 12NC29 and 12SD80  
313 (**Figure 1A**) likely result from variation in their effector repertoires. We predicted 1,532 and  
314 1,548 secreted proteins on primary contigs of 12SD80 and 12NC29, respectively, corresponding  
315 to about 9% of all protein-coding genes. Similarly, 941 and 1,043 secreted proteins were  
316 predicted on haplotigs in 12SD80 and 12NC29, respectively, (including 773 and 856 in allele  
317 pairs). About 35% of all secreted proteins were predicted as effectors by the EffectorP machine  
318 learning tool for fungal effector prediction (44) (**Table 4**). No enriched GO terms were detected  
319 among the predicted effectors, and the vast majority had no homologs with known or predicted  
320 function (**Table S3**), as is commonly observed for fungal effectors (45).

321 RNAseq datasets from different tissue types were used to identify secreted protein genes  
322 in primary contigs of each isolate that were differentially expressed during infection, and  
323 similarly expressed genes were grouped using *k*-means clustering. This analysis detected seven  
324 distinct expression profile clusters for 12SD80 and nine for 12NC29 (**Figure 4A and B, Table**

325 4). Genes in clusters 4 and 5 in 12SD80 showed high expression in haustorial samples and also  
326 relatively high expression in infected leaves, with those in cluster 4 showing the lowest  
327 expression in germinated urediniospores. Similar profiles were observed for clusters 3 and 6 in  
328 12NC29. These expression patterns are consistent with those of previously identified secreted  
329 rust effectors that enter host cells, which show high expression in haustoria (5). About 35-40% of  
330 the secreted genes in these clusters were predicted as effectors by EffectorP (**Table 4**). These  
331 clusters also show relatively high proportions of genes encoding predicted nuclear localized  
332 proteins and the lowest proportions of apoplast localized proteins as predicted by ApoplastP  
333 (Sperschneider *et al.*, submitted for publication) (**Table 4**), suggesting that these clusters are  
334 enriched for host-delivered effectors.

335 GO analysis detected an enrichment for molecular functions related to glycosyl hydrolase  
336 and peptidase activities in the *Pca* secretome (**Figure S7**), which may indicate roles for these  
337 proteins during infection in the plant apoplast. Necrotrophic and hemibiotrophic plant pathogenic  
338 fungi secrete large numbers of carbohydrate-active enzymes (CAZymes) including plant cell  
339 wall-degrading enzymes (PCWDEs) that are important for host invasion (46-48). However,  
340 biotrophs such as rust fungi contain far fewer of these enzymes and their roles are less well  
341 defined, although roles in both plant cell wall degradation and fungal cell wall reorganization  
342 have been suggested based on expression data for *Mlp* and *Pgt* (49). We detected 350 and 374  
343 CAZymes in isolates 12SD80 and 12NC29, respectively, of which about 20% (75 and 76  
344 CAZymes) were predicted to be secreted. This is consistent with estimates for other biotrophs  
345 from a fungal kingdom-wide analysis of secreted proteins (50). Secreted CAZymes were most  
346 abundant in expression cluster 6 in 12SD80 (36%) and cluster 5 in 12NC29 (20%), which both  
347 showed slightly elevated expression in germinated spores, but also significant expression under



348 *in planta* conditions (**Table 4, Figure 4A and B**), suggesting that these enzymes have roles  
349 throughout development. Interestingly, the clusters with the strongest expression in germinated  
350 spores compared to other conditions (cluster 3 in 12SD80, and clusters 4 and 9 in 12NC29) have  
351 relatively low proportions of CAZymes and the highest percentage of predicted apoplast-  
352 localized proteins. This may indicate that *Pca* employs a repertoire of apoplastic effectors that do  
353 not have similar enzymatic function to CAZymes.

354 Glycoside hydrolase (GH) enzymes are a subclass of CAZymes, with 175 and 182  
355 members detected in 12SD80 and 12NC29, respectively (**Figure 3B**). Of these, 43 and 46 were  
356 predicted to be secreted in 12SD80 and 12NC29, respectively representing approximately 60%  
357 of all secreted CAZymes. The GH5 (cellulase and other diverse enzymatic functions are in this  
358 family) and GH47 ( $\alpha$ -mannosidases) families were expanded in *Pca*, as seen in *Pgt* and *Mlp* (17),  
359 with 32 GH5 family members in both isolates, and 13 and 18 GH47 family members in 12SD80  
360 and 12NC29, respectively. However, only 2-4 members of these families were predicted as  
361 secreted, suggesting that these families have mostly intracellular roles. Consistent with previous  
362 observations in rust fungi (17) the cellulose-binding module 1 subfamily (CBM1) was not found  
363 in *Pca*.

364 Secreted subtilases (serine proteases) and aspartic proteases are predicted to act as  
365 effectors in rust fungi and may interfere with plant defense responses (51, 52). Both the A01A  
366 (aspartic proteases) and S08A (subtilisin-like serine proteases) families were expanded in the  
367 *Pca* genomes as was found for *Pgt* and *Mlp* (17) (26 and 34 members of A01A and 25 and 18  
368 members of S08A in 12SD80 and 12NC29, respectively, **Figure 3C**). A total of 11 (42%) and 17  
369 (50%) aspartic proteases and 17 (68%) and 15 (83%) serine proteases are predicted to be

370 secreted in 12SD80 and 12NC29, respectively. Unlike secreted CAZymes, these secreted  
371 proteases have no obvious clustering pattern amongst differentially expressed secretome genes.  
372 **Variation in effector candidates.** Similar to genome-wide patterns, heterozygous small variants  
373 were more abundant in 1,000 bp upstream and downstream regions than transcribed regions of  
374 effector candidate genes (**Figure S4C**). The rate of heterozygous variants was slightly higher in  
375 effectors on primary contigs compared to all genes on primary contigs in 12NC29, but not in  
376 12SD80, as was the nonsynonymous variant rate (**Table 5**). Elevated variation rates in effector  
377 genes relative to all genes were also observed in between isolate comparisons. SV impacted 13  
378 and 23 predicted effectors on primary contigs in 12SD80 and 12NC29, respectively (**Figure**  
379 **S4D**) including examples of presence/absence and copy number variation.

380 Orthologous gene relationships for effectors were identified to examine the conservation  
381 of effector repertoires between haplotypes and isolates. Approximately 50% of predicted  
382 effectors had an allele pair (**Table 3, Dataset S1 to S4**), while a total of 91 (11%) and 123 (14%)  
383 predicted effectors were haplotype singletons in 12SD80 and 12NC29, respectively (**Table 3,**  
384 **Dataset S5 to S8**). For 12SD80, 336 predicted effector genes on primary contigs had orthologs  
385 in 12NC29 (primary contigs and haplotigs), while 184 were isolate-singletons, with similar  
386 numbers observed for the reciprocal comparison (**Table 3, Dataset S9 - S12**). Inter-isolate  
387 variation rates in orthologous effector genes were slightly elevated when compared to all  
388 orthologous genes (**Table 5**). Overall, these results showed substantial variation in effector gene  
389 candidates both between haplotypes and isolates that may provide a basis for virulence  
390 differences between the isolates.

391 **Conservation of expression patterns between orthologous secreted proteins.** When orthology  
392 relationships were overlaid onto the secretome expression clusters for each isolate, the majority

393 of orthologous secreted proteins and predicted effectors showed conserved expression patterns  
394 between 12SD80 and 12NC29 (**Figure 4C-F, Figures S8 and S9**). For instance, orthologs of  
395 genes in cluster 4 of 12SD80 with the strongest haustorial expression relative to germinated  
396 spores were mainly found in cluster 3 in 12NC29, which showed an equivalent expression  
397 profile (**Figure 4C**). A number of orthologs were also found in 12NC29 cluster 6, which shows  
398 the next strongest haustorial expression, while there was a single ortholog in 12NC29 cluster 1,  
399 which was slightly upregulated in haustoria compared to all other conditions. Similar  
400 conservation of expression profiles were observed for 12NC29 genes in cluster 3, which showed  
401 strong conservation of expression patterns to 12SD80 clusters 4 and 5 (**Figure 4D**). Genes in  
402 12SD80 cluster 5 (the second strongest haustorial cluster) mostly showed orthology to genes in  
403 the equivalent cluster 6 in 12NC29, although some orthologs were in clusters 1 and 3 (**Figure**  
404 **4E**). For 12NC29 cluster 6, a similar trend of expression conservation to 12SD80 cluster 5 was  
405 observed (**Figure 4F**). A few orthologous effector candidates showed divergent expression  
406 patterns between isolates. For instance, one effector in 12SD80 cluster 5 had an ortholog in  
407 12NC29 cluster 4, which has the highest expression in germinated spores and another had an  
408 ortholog in cluster 2 showing highest expression at 5 dpi (**Figure 4E**). Such expression  
409 differences may contribute to differences in virulence phenotypes. Thus, future investigation of  
410 differential expression of orthologous effectors, as well as isolate-singleton effectors, may  
411 provide key insights into the mechanisms for virulence in *Pca*.

412 **Genomic context of predicted effector candidate genes.** Genome sequences of several  
413 filamentous plant pathogens have provided evidence for a ‘two-speed genome’ model, in which  
414 rapidly evolving effector genes are preferentially located in low gene density and repeat rich  
415 regions (53). This genome architecture may favor fast host adaptation by relieving constraints on

416 effector diversification. To determine the distribution of genes in gene-rich or sparse regions, we  
417 used a two-dimensional genome-binning method (54) to plot intergenic distances for all genes in  
418 *Pca* (**Figure 5**). Predicted effectors on primary contigs and haplotigs in both isolates showed no  
419 difference in location compared to the overall gene space. Moreover, both orthologous effector  
420 genes and isolate-singletons had similar intergenic distances to all genes. Genome-wide  
421 geometric correlation with the GenometriCorr R package (55) found no significant association  
422 between effector genes and repeat elements in either isolate. Thus, these findings do not support  
423 the presence of a ‘two speed genome’ in *Pca*, consistent with observations for other rust fungi  
424 (56).

## 425 **Conclusions and future directions**

426 A significant challenge when assembling dikaryotic fungal genomes is to capture and  
427 align haplotype variation. Here, we demonstrate successful implementation of the diploid-aware  
428 long-read assembler FALCON and FALCON-Unzip to generate highly contiguous genome  
429 assemblies and resolve haplotypes from SMRT sequencing data for the oat crown rust fungus,  
430 *Pca*. These phased-assemblies allowed detection of structural variation between haplotypes  
431 equivalent to more than 2% of the genome size that impacted a significant number of genes and  
432 predicted effectors. This type of variation has not been previously examined in rust species due  
433 to the limitations imposed by collapsed short-read genome assemblies. Furthermore, the long-  
434 read assembly approach greatly improved contiguity compared to short-read assemblies of other  
435 rust fungi, which are highly fragmented due to an abundance of repetitive sequences in their  
436 genomes. Orthology analysis also allowed detection of allele pairs on the different haplotypes, as  
437 well as many genes potentially unique to one haplotype or highly diverged. We also observed

438 high divergence in gene content and sequence between isolates, which may reflect their origins  
439 from geographically separated populations (South Dakota vs North Carolina). Transcriptome  
440 profiling revealed clusters of haustorially-expressed secreted proteins that are likely enriched for  
441 host-delivered effectors, as well as clusters of predicted CAZymes and apoplastic effectors that  
442 are preferentially expressed in germinated urediniospores.

443 Several mechanisms including mutation, sexual recombination and somatic hybridization  
444 are postulated to cause changes in virulence phenotypes in rust fungal populations (14, 16).  
445 However, few studies have specifically characterized molecular events associated with virulence  
446 variation, and large-scale whole-genome comparative population analyses have not been  
447 conducted for rust fungi. The high quality haplotype-phased genome references for two  
448 dikaryotic *Pca* isolates developed in this study provide the foundation for large-scale  
449 resequencing of *Pca* isolates to identify genetic variation underlying variability in virulence  
450 phenotypes. The identification of the *Avr* genes corresponding to known oat *R* genes will help to  
451 prioritize and pyramid broadly effective *R* genes in oat breeding programs.

## 452 **Materials and Methods**

453 ***Puccinia coronata* f. sp. *avenae* (*Pca*) isolates and plant inoculations.** *Pca* isolates 12NC29  
454 (pathotype LBBB) and 12SD80 (pathotype STTG) were collected from North Carolina and  
455 South Dakota, respectively, by the USDA-ARS Cereal Disease Laboratory (CDL) annual rust  
456 surveys in 2012 and stored at -80°C. To ensure isolate purity, two single-pustule purifications  
457 from low density infections on seven-day old oat seedlings (variety ‘Marvelous’) were  
458 completed prior to amplification of urediniospores as described by Carson (6). Heat shock

459 activated (45°C, 15 minutes) urediniospores were resuspended in Isopar M oil (ExxonMobil) at 2  
460 mg spores/ml and for spray-inoculation (50 µl per plant). Inoculated plants were placed in dew  
461 chambers in the dark overnight (16 hours) with 2 minutes of misting every 30 minutes then  
462 maintained in isolated growth chambers (18/6 hour light/dark, 22/18°C day/night, 50% relative  
463 humidity). Pathotype assignment and final assessments of identity and purity of each isolate was  
464 performed using standard oat differential lines (2, 7), with infection scores converted to a 0-9  
465 numeric scale for heat map generation.

466 **DNA extraction from *Pca* urediniospores for Illumina and PacBio Sequencing.** Freshly  
467 harvested urediniospores were germinated as described (57) and fungal mats were vacuum dried,  
468 lyophilized and stored at -80°C. The lyophilized tissue was ground in liquid nitrogen in 20-30 mg  
469 batches in 2 ml microcentrifuge tubes. DNA was extracted using genomic-tip 20/G columns  
470 (Qiagen catalog number 10223) following a user-supplied protocol  
471 ([https://www.qiagen.com/us/resources/resourcedetail?id=cb2ac658-8d66-43f0-968e-  
472 7bb0ea2c402a&lang=en](https://www.qiagen.com/us/resources/resourcedetail?id=cb2ac658-8d66-43f0-968e-7bb0ea2c402a&lang=en)) except that lysis buffer contained 0.5 mg/ml of lysing enzymes from  
473 *Trichoderma harzianum* (Sigma L1412) and DNA was resuspended in Qiagen EB. Qubit  
474 (Invitrogen) and pulsed-field gel electrophoresis with a CHEF-DR III (Bio-Rad) were used to  
475 evaluate DNA quantity and quality, with yields of 15-20 µg per 200 mg of tissue obtained.

476 **Genomic DNA sequencing and *de novo* assembly.** Approximately 10 µg of genomic DNA was  
477 purified with AMPure XP beads (Beckman Coulter) and sheared to an average size of 20 kbp  
478 using g-TUBEs (Covaris). Size and quantity were assessed using the TapeStation 2200 (Agilent  
479 Technologies). Library preparation followed the PacBio standard 20 kbp protocol, with size  
480 selection performed using a BluePippin (Sage Science) with a 0.75% agarose cassette and a

481 lower cutoff of 7 kbp. Twenty five SMRT cells per library were run on the PacBio RSII (Pacific  
482 Biosciences) using P6/C4 chemistry, 0.15 nM MagBead loading concentration, and 360-minute  
483 movie lengths at the Frederick National Laboratory for Cancer Research (Frederick, MD, USA).  
484 Illumina libraries were prepared from 100 ng of genomic DNA with the TruSeq Nano DNA  
485 procedure and a 350 bp insert size. Both libraries were multiplexed and sequenced in one lane  
486 (HiSeq 2500, Rapid Run Mode, 100 bp paired-end reads) at the University of Minnesota  
487 Genomics Center (UMGC) (MN, USA) using Illumina Real Time Analysis software version  
488 1.18.64 for quality-scored base calling.

489 SMRT reads were assembled using FALCON version 0.7.3  
490 ([https://github.com/PacificBiosciences/FALCON-integrate/tree/funzip\\_052016](https://github.com/PacificBiosciences/FALCON-integrate/tree/funzip_052016)). After several  
491 trial assemblies, a set of parameters was selected with a relatively stringent overlap length to  
492 reduce mis-assembly of repetitive regions while maintaining a high contiguity (**Text S1**). The  
493 read length cutoff was auto-computed as 9,691 bp for 12NC29 and 8,765 bp for 12SD80. After  
494 assembly, FALCON-Unzip (31) was used to phase haplotypes and generate consensus sequences  
495 for primary contigs and haplotigs using default parameters. Primary contigs and haplotigs were  
496 polished using the Quiver algorithm and corrected for SNPs and indels using Illumina data via  
497 Pilon with parameters --diploid and --fix all (58).

498 Low-quality contigs (over 20% of their size masked by Quiver and smaller than 100 kbp)  
499 were removed using custom python scripts. Eleven contigs from 12NC29 and 2 contigs from  
500 12SD80 with significant hits to non-fungal organisms (BLAST search against the NCBI nr/nt  
501 database) were excluded as contaminants. Final assembly metrics were derived using QUAST  
502 version 4.3 (59) and the Integrative Genomics Viewer (IGV) (60) was used to visualize haplotig

503 regions in primary contigs. To evaluate assembly completeness, the fungal lineage set of  
504 orthologs in the software BUSCO (v2.0) (34) was used for comparison, with *Ustilago maydis* as  
505 the species selected for AUGUSTUS gene prediction.

506 **RNA isolation.** Seven day-old oat seedlings were inoculated with 10 mg spores/ml or mock-  
507 inoculated with oil. Three leaves were pooled per biological replicate at 2 and 5 days post  
508 inoculation (dpi), frozen in liquid nitrogen and kept at -80°C. Haustoria were isolated from  
509 infected leaves at 5 dpi (inoculated with 20 mg spores/ml) as previously described (18) and  
510 stored at -80°C. Prior to RNA extraction, haustorial cells were resuspended in 500 µl of RLT  
511 lysis buffer (Qiagen), transferred to FastPrep Lysing beads (MP Biomedicals) and homogenized  
512 at 6,000 rpm for 40 seconds using a bead-beating homogenizer. Germinated urediniospores (16  
513 hours) were frozen in liquid nitrogen and kept at -80°C. Three biological replicates were  
514 performed for each condition. Samples were ground in liquid nitrogen and RNA was extracted  
515 using the RNeasy Plant Mini Kit (Qiagen) according to the manufacturer's protocols. RNA  
516 quality was assessed using an Agilent 2100 Bioanalyzer.

517 **RNA sequencing and transcriptome assembly.** Strand-specific RNA library construction and  
518 sequencing (Illumina HiSeq 2500 125 bp PE reads) was carried out at the UMGC. Libraries from  
519 germinated spores, *in planta* infections, and mock conditions were multiplexed across three  
520 lanes, while libraries from haustoria samples were multiplexed across two lanes. Short-reads and  
521 low quality bases were trimmed using Trimmomatic (61) with parameters: ILLUMINACLIP  
522 2:30:10 LEADING 3 TRAILING 3 SLIDINGWINDOW 4:10 and MINLEN 100. *De novo*  
523 transcriptome assembly was performed separately for each isolate using combined reads from  
524 germinated spores, infected plants and haustoria using Trinity v2.4.0 with parameters: --



525 SS\_lib\_type RF --normalize\_reads (37). The combined reads were also mapped to the assembled  
526 genomes of each isolate using HISAT2 v2.0.5 (62) with parameters: --rna-strandness RF --no-  
527 mixed. Genome-guided assemblies were generated using Trinity with parameters: --SS\_lib\_type  
528 RF --genome\_guided\_max\_intron 3000 --normalize\_reads.

529 **Genome annotation.** Each *Pca* assembly (primary contigs and haplotigs combined) was  
530 annotated with Funannotate (version 0.6.0, <https://github.com/nextgenusfs/funannotate>) in  
531 diploid mode using transcript evidence from HISAT2 RNAseq alignments, *de novo* Trinity  
532 assemblies, genome-guided Trinity assemblies, and EST clusters from the Department of  
533 Energy-Joint Genome Institute (DOE-JGI) for the Pucciniomycotina group (downloaded Feb 20,  
534 2017, <http://genome.jgi.doe.gov/pucciniomycotina/pucciniomycotina.info.html>). The  
535 Funannotate pipeline ran the following: i) repeats were identified using RepeatModeler (63) and  
536 soft-masked using RepeatMasker (64), ii) protein evidence from UniProtKB/SwissProt curated  
537 database (downloaded on April 26, 2017) was aligned to the genomes using TBLASTN and  
538 exonerate (65), iii) transcript evidence was aligned using GMAP (66), iv) *ab initio* gene  
539 predictors AUGUSTUS v3.2.3 (67) and GeneMark-ET v4.32 (68) were trained using BRAKER1  
540 (69), v) tRNAs were predicted with tRNAscan-SE (70), vi) consensus protein coding gene  
541 models were predicted using EvidenceModeler (71), vii) and finally gene models were discarded  
542 if they were more than 90% contained within a repeat masked region and/or identified from a  
543 BLASTp search of known transposons against TransposonPSI (72) and Repbase repeat databases  
544 (73). Any fatal errors detected by tbl2asn (<https://www.ncbi.nlm.nih.gov/genbank/asndisc/>) were  
545 fixed. Functional annotation used available databases and tools including PFAM (74), InterPro  
546 (75), UniProtKB (76), MEROPS(77), CAZymes (78), and a set of transcription factors based on

547 InterProScan domains (79) to assign functional annotations (full list at  
548 <https://github.com/nextgenusfs/funannotate>). Functional annotations for each isolate were  
549 compared (compare function) and summary heatmaps prepared from the parsed results using  
550 ComplexHeatmap (1.12.0) in R. Gene ontology (GO) terms were compared between isolates  
551 using goatools with Fisher's exact test with false discovery rate and multiple test correction  
552 (<https://github.com/tanghaibao/goatools>).

553 **Identification of collapsed and haplotig-associated regions, telomeres and GC content**  
554 **analysis.** Primary contigs and haplotigs were aligned pair-wise using NUCmer (80) with default  
555 parameters. A customized script was used to determine coordinates for matches between primary  
556 contigs and haplotigs by scanning aligned blocks along the primary contigs and chaining the  
557 aligned haplotig blocks located within 15 kbp. Illumina DNA-sequencing reads were mapped to  
558 primary contigs and haplotigs with BWA-MEM version 0.7.12 with default parameters. SAM  
559 alignment files were sorted and converted to BAM files with SAMtools (v1.3) (81) and to BED  
560 format with BEDtools (v2.25) (82). Coverage was estimated using BEDtools complement and  
561 coverage and assigned to genomic regions using the haplotig-region coordinate files. Coverage  
562 distributions were plotted as density histograms with the ggjoy package in R. The GC content of  
563 all contigs was calculated and the distribution plotted with the hist function in R. Telomeres were  
564 identified by the presence of at least 10 repeats of CCCTAA or TTAGGG within 200 bp of the  
565 end of a contig using a custom script.

566 **Genome-wide heterozygosity and variant analysis.** Small variants (SNPs and indels) were  
567 identified by mapping Illumina DNA-sequencing reads to only the primary contigs of each  
568 assembly using BWA-MEM version 0.7.12 with default parameters. PCR duplicates were

569 removed using SAMtools (v1.3) (81) and SNPs were called using FreeBayes (v1.1.0) (83). SNPs  
570 were filtered using vcflib (v1.0.0-rc1, <https://github.com/vcflib/vcflib>) with parameters (QUAL >  
571 20 & QUAL / AO > 10 & SAF > 0 & SAR > 0 & RPR > 1 & RPL > 1 & AB > 0.2 & AB < 0.8)  
572 within isolates or (QUAL > 20 & QUAL / AO > 10 & SAF > 0 & SAR > 0 & RPR > 1 & RPL >  
573 1) between isolates. Variants were annotated for genomic location and functional impact using  
574 ANNOVAR (2017 Jul 16 version) (84).

575 *K-mer* counts (21 bp) were generated with Jellyfish (v2.1.3) from raw Illumina DNA  
576 sequencing data of *Pca* isolates as well as Illumina sequencing data downloaded from the NCBI  
577 SRA for the rust species: *Melampsora larici-populina* (SRR4063847) (17), *Puccinia striiformis*  
578 f. sp. *tritici* (SRR058505 and SRR058506) (19), *Puccinia triticina* (SRR027504 and  
579 SRR027505), and *Melampsora lini* (22). The resulting histograms were used as input for  
580 GenomeScope (41).

581 To identify structural variations (SV), haplotigs were aligned to primary contigs with  
582 MUMmer (v3.23) with parameters: nucmer -maxmatch -l 100 -c 500 (80). SVs were detected  
583 with Assemblytics (42) using default parameters with a minimum variant size of 50 bp, a  
584 maximum variant size of 10 kbp, and a unique sequence length for anchor filtering of 10 kbp.

585 **Identification of alleles and orthologs between isolates.** Proteinortho (38) with parameters: -e  
586 1e-05 -synteny -singles was used to identify orthologous groups based on all-against-all blastp  
587 search of all annotated genes in 12SD80 and 12NC29, followed by construction of an edge-  
588 weighted directed graph (edge weight = blast bit score), and heuristic identification of maximal  
589 complete multipartite subgraphs. Protein nodes included in subgraphs were defined as  
590 orthologous groups. Orthologous genes located in homologous haplotig and primary contig

591 regions based on a gene annotation (gff3) file were assigned as allele pairs.

592 **Secretome and effector prediction and expression analysis.** Secreted proteins were predicted  
593 using a method sensitive to fungal effector discovery (85) based on: (i) the presence of a  
594 predicted signal peptide using SignalP-NN 3.0 (86), (ii) a TargetP localization prediction of  
595 “secreted” or “unknown” (with no restriction on the RC score) (87), and (iii) no transmembrane  
596 domain outside the signal peptide region (with TMHMM 2.0) (88). Secreted effectors were  
597 predicted using EffectorP 1.0 (44). FeatureCounts (89) was used to generate read counts for each  
598 gene from RNAseq data and genes differentially expressed in either haustoria or infected leaves  
599 relative to germinated spores ( $|\log \text{ fold change}| > 1.5$  and an adjusted  $p$ -value  $< 0.1$ ) were  
600 identified using the DESeq2 R package (90). k-means clustering was performed on average rlog  
601 transformed values for each gene and condition. The optimal number of clusters was defined  
602 using the elbow plot method and circular heatmaps drawn using Circos (91). Gene ontology  
603 (GO) enrichment analysis was carried out with the enrichGO function in the R package  
604 clusterProfiler version 3.4.4 (92) using the “Molecular function” ontology method and the Holm  
605 method to correct  $p$ -values for multiple comparisons. Local gene density was assessed using the  
606 method of Saunders et al. (54), with updates from density-Mapr  
607 (<https://github.com/Adamtaranto/density-Mapr>) to plot the 5’ and 3’ intergenic distance for each  
608 gene. The R package GenometriCorr (55) was used to test for associations between effectors and  
609 various categories of repeats within 10 kbp regions using default parameters.

610 **Data and script availability.** All raw sequence reads generated and used in this study are  
611 available in the NCBI BioProject (PRJNA398546). Genome assemblies and annotations are  
612 available for download at the DOE-JGI MycoCosm Portal

613 ([http://genome.jgi.doe.gov/PuccoNC29\\_1](http://genome.jgi.doe.gov/PuccoNC29_1) and [http://genome.jgi.doe.gov/PuccoSD80\\_1](http://genome.jgi.doe.gov/PuccoSD80_1)). Unless  
614 specified otherwise all scripts and files are available at [https://github.com/figueroalab/Pca-](https://github.com/figueroalab/Pca-genome)  
615 [genome](https://github.com/figueroalab/Pca-genome).

## 616 **Acknowledgments**

617 We thank Dr. Kevin Silverstein at the Minnesota Supercomputing Institute for discussions  
618 during genome assembly and analysis. At the USDA-ARS Cereal Disease Laboratory, we thank  
619 Roger Caspers for his assistance in maintaining the *Pca* isolates and assigning virulence  
620 phenotypes, and Drs. Les Szabo and Jerry Johnson for their assistance during DNA isolation. We  
621 also acknowledge Prof. Mark Farman at the University of Kentucky for his input while  
622 identifying telomere sequences, and Dr. Matthew Seetin at Pacific Biosciences for assistance  
623 with FALCON and FALCON-Unzip.

## 624 **Funding information**

625 This work was funded by the USDA-ARS-The University of Minnesota Standard Cooperative  
626 Agreement (3002-11031-00053115) between S.F.K and M.F, The University of Minnesota  
627 Experimental Station USDA-NIFA Hatch/Figueroa project MIN-22-058, and an Organization for  
628 Economic Co-operation and Development Fellowship to M.F. M.E.M was partially supported by  
629 a USDA-NIFA Postdoctoral Fellowship Award (2017-67012-26117). J.S was supported by an  
630 OCE Postdoctoral Fellowship. R.F.P receives funding from the Australian Grains Research  
631 Development Corporation grant number US00067. J.M.P was supported by the Northern  
632 Research Station of the USDA Forest Service. The funders had no role in study design, data

633 collection and interpretation, or the decision to submit the work for publication.

## 634 **References**

- 635 1. FAO. 214. FAO (2014) FAOSTAT statistical database, Rome, Italy: FAO.  
636 <http://www.fao.org/faostat/en/#data>. Date accessed April 1, 2017.
- 637 2. Nazareno E, Li F, Smith M, Park RF, Kianian SF, Figueroa M. 2017. *Puccinia coronata* f. sp.  
638 *avenae*: a threat to global oat production. Mol. Plant Pathol. *in press*.
- 639 3. Leonard K, Martinelli J. 2005. Virulence of oat crown rust in Brazil and Uruguay. Plant  
640 Dis. 89:802-808.
- 641 4. USDA. 2015. 2014 Oat Loss to Rust (%). St. Paul, MN. Cereal Diseases Laboratory,  
642 Agriculture Research Service, United States Department of Agriculture. Online:  
643 [http://www.ars.usda.gov/SP2UserFiles/ad\\_hoc/36400500Smallgrainlossesduetorust/2014loss/2014oatloss.pdf](http://www.ars.usda.gov/SP2UserFiles/ad_hoc/36400500Smallgrainlossesduetorust/2014loss/2014oatloss.pdf). Cereal Diseases Laboratory, Agriculture Research Service, United States  
644 Department of Agriculture Online:  
645 [http://www.ars.usda.gov/SP2UserFiles/ad\\_hoc/36400500Smallgrainlossesduetorust/2014loss/2014oatloss.pdf](http://www.ars.usda.gov/SP2UserFiles/ad_hoc/36400500Smallgrainlossesduetorust/2014loss/2014oatloss.pdf).
- 646 5. Garnica DP, Nemri A, Upadhyaya NM, Rathjen JP, Dodds PN. 2014. The ins and outs of rust  
647 haustoria. PLoS Pathogens 10:e1004329.
- 648 6. Carson M. 2011. Virulence in oat crown rust (*Puccinia coronata* f. sp. *avenae*) in the United  
649 States from 2006 through 2009. Plant Dis. 95:1528-1534.
- 650 7. Chong J, Leonard K, Salmeron J. 2000. A North American system of nomenclature for *Puccinia*  
651 *coronata* f. sp. *avenae*. Plant Dis. 84:580-585.
- 652 8. Flor H. 1971. Current status of the gene-for-gene concept. Ann. Rev. Phytopath 9:275-296.
- 653 9. Dodds PN, Rathjen JP. 2010. Plant immunity: towards an integrated view of plant-pathogen  
654 interactions. Nat Rev Genet 11:539-48.
- 655 10. Periyannan S, Milne R, Figueroa M, Lagudah ES, Dodds PN. 2017. An overview of genetic rust  
656 resistance: from broad to specific mechanisms. PLoS Pathogens  
657 doi:10.1371/journal.ppat.1006380.
- 658 11. Stukenbrock EH, McDonald BA. 2008. The origins of plant pathogens in agro-ecosystems. Annu  
659 Rev Phytopathol 46:75-100.
- 660 12. Ravensdale M, Nemri A, Thrall PH, Ellis JG, Dodds PN. 2011. Co-evolutionary interactions  
661 between host resistance and pathogen effector genes in flax rust disease. Mol Plant Pathol 12:93-  
662 102.
- 663 13. Anderson C, Khan MA, Catanzariti A-M, Jack CA, Nemri A, Lawrence GJ, Upadhyaya NM,  
664 Hardham AR, Ellis JG, Dodds PN. 2016. Genome analysis and avirulence gene cloning using a  
665 high-density RADseq linkage map of the flax rust fungus, *Melampsora lini*. BMC Genomics  
666 17:667.
- 667 14. Park R. 2008. Breeding cereals for rust resistance in Australia. Plant Path 57:591-602.
- 668 15. Bartos P, Fleischmann G, Samborski D, Shipton W. 1969. Studies on asexual variation in the  
669 virulence of oat crown rust, *Puccinia coronata* f. sp. *avenae*, and wheat leaf rust, *Puccinia*  
670 *recondita*. Can J Bot 47:1383-1387.
- 671 16. Park RF, Wellings CR. 2012. Somatic hybridization in the Uredinales. Annu Rev Phytopathol  
672 50:219-239.
- 673 17. Duplessis S, Cuomo CA, Lin YC, Aerts A, Tisserant E, Veneault-Fourrey C, Joly DL, Hacquard  
674 S, Amsellem J, Cantarel BL, Chiu R, Coutinho PM, Feau N, Field M, Frey P, Gelhaye E,  
675 Goldberg J, Grabherr MG, Kodira CD, Kohler A, Kues U, Lindquist EA, Lucas SM, Mago R,  
676 Mauceli E, Morin E, Murat C, Pangilinan JL, Park R, Pearson M, Quesneville H, Rouhier N,

- 679 Sakthikumar S, Salamov AA, Schmutz J, Selles B, Shapiro H, Tanguay P, Tuskan GA, Henrissat  
680 B, Van de Peer Y, Rouze P, Ellis JG, Dodds PN, Schein JE, Zhong S, Hamelin RC, Grigoriev IV,  
681 Szabo LJ, Martin F. 2011. Obligate biotrophy features unraveled by the genomic analysis of rust  
682 fungi. *Proc Natl Acad Sci USA* 108:9166-71.
- 683 18. Upadhyaya NM, Garnica DP, Karaoglu H, Sperschneider J, Nemri A, Xu B, Mago R, Cuomo  
684 CA, Rathjen JP, Park RF. 2015. Comparative genomics of Australian isolates of the wheat stem  
685 rust pathogen *Puccinia graminis* f. sp. *tritici* reveals extensive polymorphism in candidate  
686 effector genes. *Front Plant Sci* 5. Article 759.
- 687 19. Cantu D, Govindarajulu M, Kozik A, Wang M, Chen X, Kojima KK, Jurka J, Michelmore RW,  
688 Dubcovsky J. 2011. Next generation sequencing provides rapid access to the genome of *Puccinia*  
689 *striiformis* f. sp. *tritici*, the causal agent of wheat stripe rust. *PLoS One* 6:e24230.
- 690 20. Cantu D, Segovia V, MacLean D, Bayles R, Chen X, Kamoun S, Dubcovsky J, Saunders DG,  
691 Uauy C. 2013. Genome analyses of the wheat yellow (stripe) rust pathogen *Puccinia striiformis* f.  
692 sp. *tritici* reveal polymorphic and haustorial expressed secreted proteins as candidate effectors.  
693 *BMC Genomics* 14:270.
- 694 21. Zheng W, Huang L, Huang J, Wang X, Chen X, Zhao J, Guo J, Zhuang H, Qiu C, Liu J. 2013.  
695 High genome heterozygosity and endemic genetic recombination in the wheat stripe rust fungus.  
696 *Nat Comm* 4.
- 697 22. Nemri A, Saunders DG, Anderson C, Upadhyaya NM, Win J, Lawrence GJ, Jones DA, Kamoun  
698 S, Ellis JG, Dodds PN. 2014. The genome sequence and effector complement of the flax rust  
699 pathogen *Melampsora lini*. *Front Plant Sci* 5: 98.
- 700 23. Loehrer M, Vogel A, Huettel B, Reinhardt R, Benes V, Duplessis S, Usadel B, Schaffrath U.  
701 2014. On the current status of *Phakopsora pachyrhizi* genome sequencing. *Front Plant Sci* 5:377-  
702 377.
- 703 24. Cuomo CA, Bakkeren G, Khalil HB, Panwar V, Joly D, Linning R, Sakthikumar S, Song X,  
704 Adiconis X, Fan L. 2017. Comparative analysis highlights variable genome content of wheat rusts  
705 and divergence of the mating loci. *G3: Genes Genom Genet* 7:361-376.
- 706 25. Maia T, Badel JL, Marin-Ramirez G, Rocha CdM, Fernandes MB, Silva JC, Azevedo-Junior GM,  
707 Brommonschenkel SH. 2017. The *Hemileia vastatrix* effector HvEC-016 suppresses bacterial  
708 blight symptoms in coffee genotypes with the SH1 rust resistance gene. *New Phytologist*  
709 213:1315-1329.
- 710 26. Manning VA, Pandelova I, Dhillon B, Wilhelm LJ, Goodwin SB, Berlin AM, Figueroa M,  
711 Freitag M, Hane JK, Henrissat B. 2013. Comparative genomics of a plant-pathogenic fungus,  
712 *Pyrenophora tritici-repentis*, reveals transduplication and the impact of repeat elements on  
713 pathogenicity and population divergence. *G3: Genes Genom Genet* 3:41-63.
- 714 27. Dean RA, Talbot NJ, Ebbole DJ, Farman ML. 2005. The genome sequence of the rice blast  
715 fungus *Magnaporthe grisea*. *Nature* 434:980.
- 716 28. Kämper J, Kahmann R, Bölker M, Li-Jun M, Brefort T, Saville BJ, Banuett F, Kronstad JW,  
717 Gold SE, Müller O. 2006. Insights from the genome of the biotrophic fungal plant pathogen  
718 *Ustilago maydis*. *Nature* 444:97.
- 719 29. Ma L-J, Van Der Does HC, Borkovich KA, Coleman JJ, Daboussi M-J, Di Pietro A, Dufresne M,  
720 Freitag M, Grabherr M, Henrissat B. 2010. Comparative genomics reveals mobile pathogenicity  
721 chromosomes in *Fusarium*. *Nature* 464:367-373.
- 722 30. Huddleston J, Ranade S, Malig M, Antonacci F, Chaisson M, Hon L, Sudmant PH, Graves TA,  
723 Alkan C, Dennis MY. 2014. Reconstructing complex regions of genomes using long-read  
724 sequencing technology. *Genome Res* 24:688-696.
- 725 31. Chin C-S, Peluso P, Sedlazeck FJ, Nattestad M, Concepcion GT, Clum A, Dunn C, O'Malley R,  
726 Figueroa-Balderas R, Morales-Cruz A. 2016. Phased diploid genome assembly with single-  
727 molecule real-time sequencing. *Nature Methods* 13:1050-1054.

- 728 32. Eilam T, Bushnell W, Anikster Y. 1994. Relative nuclear DNA content of rust fungi estimated by  
729 flow cytometry of propidium iodide-stained pycniospores. *Phytopathology* 84:728-734.
- 730 33. Tavares S, Ramos AP, Pires AS, Azinheira HG, Caldeirinha P, Link T, Abranches R, do Céu  
731 Silva M, Voegelé RT, Loureiro J. 2014. Genome size analyses of Pucciniales reveal the largest  
732 fungal genomes. *Front Plant Sci* 5.
- 733 34. Simão FA, Waterhouse RM, Ioannidis P, Kriventseva EV, Zdobnov EM. 2015. BUSCO:  
734 assessing genome assembly and annotation completeness with single-copy orthologs.  
735 *Bioinformatics*:btv351.
- 736 35. Leonard KJ, Szabo LJ. 2005. Pathogen profile. Stem rust of small grains and grasses caused by  
737 *Puccinia graminis*. *Mol Plant Pathol* 6:489-489.
- 738 36. Testa AC, Oliver RP, Hane JK. 2016. OcculterCut: a comprehensive survey of AT-rich regions in  
739 fungal genomes. *Genome Biol Evol* 8:2044-2064.
- 740 37. Haas BJ, Papanicolaou A, Yassour M, Grabherr M, Blood PD, Bowden J, Couger MB, Eccles D,  
741 Li B, Lieber M. 2013. *De novo* transcript sequence reconstruction from RNA-seq using the  
742 Trinity platform for reference generation and analysis. *Nature protocols* 8:1494-1512.
- 743 38. Lechner M, Findeiß S, Steiner L, Marz M, Stadler PF, Prohaska SJ. 2011. Proteinortho: detection  
744 of (co-) orthologs in large-scale analysis. *BMC Bioinformatics* 12:124.
- 745 39. Kanehisa M, Furumichi M, Tanabe M, Sato Y, Morishima K. 2017. KEGG: new perspectives on  
746 genomes, pathways, diseases and drugs. *Nucleic acids research* 45:D353-D361.
- 747 40. Tan K-C, Oliver RP. 2017. Regulation of proteinaceous effector expression in phytopathogenic  
748 fungi. *PLoS pathogens* 13:e1006241.
- 749 41. Vurture GW, Sedlazeck FJ, Nattestad M, Underwood CJ, Fang H, Gurtowski J, Schatz MC. 2017.  
750 GenomeScope: Fast reference-free genome profiling from short reads. *Bioinformatics*:btx153.
- 751 42. Nattestad M, Schatz MC. 2016. Assemblytics: a web analytics tool for the detection of variants  
752 from an assembly. *Bioinformatics* 32:3021-3023.
- 753 43. Toruño TY, Stergiopoulos I, Coaker G. 2016. Plant-pathogen effectors: cellular probes interfering  
754 with plant defenses in spatial and temporal manners. *Annu Rev Phytopathol* 54:419-441.
- 755 44. Sperschneider J, Gardiner DM, Dodds PN, Tini F, Covarelli L, Singh KB, Manners JM, Taylor  
756 JM. 2015. EffectorP: Predicting Fungal Effector Proteins from Secretomes Using Machine  
757 Learning. *New Phytol in press*.
- 758 45. Sperschneider J, Dodds PN, Gardiner DM, Manners JM, Singh KB, Taylor JM. 2015. Advances  
759 and Challenges in Computational Prediction of Effectors from Plant Pathogenic Fungi. *PLoS*  
760 *pathogens* 11.5 (2015): e1004806.
- 761 46. Cantarel BL, Coutinho PM, Rancurel C, Bernard T, Lombard V, Henrissat B. 2008. The  
762 Carbohydrate-Active EnZymes database (CAZy): an expert resource for glycogenomics. *Nucleic*  
763 *Acids Res* 37:D233-D238.
- 764 47. Choi J, Kim K-T, Jeon J, Lee Y-H. 2013. Fungal plant cell wall-degrading enzyme database: a  
765 platform for comparative and evolutionary genomics in fungi and Oomycetes. *BMC Genomics*  
766 14:S7.
- 767 48. Zhao Z, Liu H, Wang C, Xu J-R. 2013. Comparative analysis of fungal genomes reveals different  
768 plant cell wall degrading capacity in fungi. *BMC Genomics* 14:274.
- 769 49. Lyu X, Shen C, Fu Y, Xie J, Jiang D, Li G, Cheng J. 2015. Comparative genomic and  
770 transcriptional analyses of the carbohydrate-active enzymes and secretomes of phytopathogenic  
771 fungi reveal their significant roles during infection and development. *Scientific reports* 5.
- 772 50. Kim K-T, Jeon J, Choi J, Cheong K, Song H, Choi G, Kang S, Lee Y-H. 2016. Kingdom-wide  
773 analysis of fungal small secreted proteins (SSPs) reveals their potential role in host association.  
774 *Front Plant Sci* 7.
- 775 51. Li J, Gu F, Wu R, Yang J, Zhang K-Q. 2017. Phylogenomic evolutionary surveys of subtilase  
776 superfamily genes in fungi. *Sci Rep* 7.



- 777 52. Cooper B, Campbell KB, Beard HS, Garrett WM, Islam N. 2016. Putative rust fungal effector  
778 proteins in infected bean and soybean leaves. *Phytopathology* 106:491-499.
- 779 53. Dong S, Raffaele S, Kamoun S. 2015. The two-speed genomes of filamentous pathogens: waltz  
780 with plants. *Curr. Opin. Genet. Dev.* 35:57-65.
- 781 54. Saunders DG, Win J, Kamoun S, Raffaele S. 2014. Two-dimensional data binning for the  
782 analysis of genome architecture in filamentous plant pathogens and other eukaryotes. *Plant-*  
783 *pathogen interactions: Methods and Protocols*:29-51.
- 784 55. Favorov A, Mularoni L, Cope LM, Medvedeva Y, Mironov AA, Makeev VJ, Wheelan SJ. 2012.  
785 Exploring massive, genome scale datasets with the GenometriCorr package. *PLoS Computational*  
786 *Biol* 8:e1002529.
- 787 56. Saunders DG, Win J, Cano LM, Szabo LJ, Kamoun S, Raffaele S. 2012. Using hierarchical  
788 clustering of secreted protein families to classify and rank candidate effectors of rust fungi. *PLoS*  
789 *One* 7:e29847.
- 790 57. Barnes C, Szabo L. 2008. A rapid method for detecting and quantifying bacterial DNA in rust  
791 fungal DNA samples. *Phytopathology* 98:115-119.
- 792 58. Walker BJ, Abeel T, Shea T, Priest M, Abouelliel A, Sakthikumar S, Cuomo CA, Zeng Q,  
793 Wortman J, Young SK. 2014. Pilon: an integrated tool for comprehensive microbial variant  
794 detection and genome assembly improvement. *PloS One* 9:e112963.
- 795 59. Gurevich A, Saveliev V, Vyahhi N, Tesler G. 2013. QUAST: quality assessment tool for genome  
796 assemblies. *Bioinformatics* 29:1072-1075.
- 797 60. Thorvaldsdóttir H, Robinson JT, Mesirov JP. 2013. Integrative Genomics Viewer (IGV): high-  
798 performance genomics data visualization and exploration. *Brief. Bioinform.* 14:178-192.
- 799 61. Bolger AM, Lohse M, Usadel B. 2014. Trimmomatic: a flexible trimmer for Illumina sequence  
800 data. *Bioinformatics* 30:2114-2120.
- 801 62. Kim D, Langmead B, Salzberg SL. 2015. HISAT: a fast spliced aligner with low memory  
802 requirements. *Nature Methods* 12:357-360.
- 803 63. Smit A, Hubley R. RepeatModeler Open-1.0. 2008.
- 804 64. Smit A, Hubley R, Green P. 2015. RepeatMasker Open-4.0. 2013–2015. Institute for Systems  
805 Biology <http://repeatmasker.org>.
- 806 65. Slater GSC, Birney E. 2005. Automated generation of heuristics for biological sequence  
807 comparison. *BMC Bioinformatics* 6:31.
- 808 66. Wu TD, Watanabe CK. 2005. GMAP: a genomic mapping and alignment program for mRNA  
809 and EST sequences. *Bioinformatics* 21:1859-1875.
- 810 67. Stanke M, Morgenstern B. 2005. AUGUSTUS: a web server for gene prediction in eukaryotes  
811 that allows user-defined constraints. *Nucleic Acids Res* 33:W465-W467.
- 812 68. Besemer J, Borodovsky M. 2005. GeneMark: web software for gene finding in prokaryotes,  
813 eukaryotes and viruses. *Nucleic Acids Res* 33:W451-W454.
- 814 69. Hoff KJ, Lange S, Lomsadze A, Borodovsky M, Stanke M. 2015. BRAKER1: unsupervised  
815 RNA-Seq-based genome annotation with GeneMark-ET and AUGUSTUS. *Bioinformatics*  
816 32:767-769.
- 817 70. Lowe TM, Chan PP. 2016. tRNAscan-SE On-line: integrating search and context for analysis of  
818 transfer RNA genes. *Nucleic Acids Res* 44:W54-W57.
- 819 71. Haas BJ, Salzberg SL, Zhu W, Pertea M, Allen JE, Orvis J, White O, Buell CR, Wortman JR.  
820 2008. Automated eukaryotic gene structure annotation using EVIDENCEModeler and the Program  
821 to Assemble Spliced Alignments. *Genome Biol* 9:R7.
- 822 72. Haas B. 2014. TransposonPSI: an application of PSI-blast to mine (Retro-) transposon ORF  
823 homologies.
- 824 73. Bao W, Kojima KK, Kohany O. 2015. Repbase Update, a database of repetitive elements in  
825 eukaryotic genomes. *Mobile DNA* 6:11.

- 826 74. Finn RD, Bateman A, Clements J, Coggill P, Eberhardt RY, Eddy SR, Heger A, Hetherington K,  
827 Holm L, Mistry J. 2013. Pfam: the protein families database. *Nucleic Acids Res* 42:D222-D230.
- 828 75. Jones P, Binns D, Chang H-Y, Fraser M, Li W, McAnulla C, McWilliam H, Maslen J, Mitchell  
829 A, Nuka G. 2014. InterProScan 5: genome-scale protein function classification. *Bioinformatics*  
830 30:1236-1240.
- 831 76. Apweiler R, Bairoch A, Wu CH, Barker WC, Boeckmann B, Ferro S, Gasteiger E, Huang H,  
832 Lopez R, Magrane M. 2004. UniProt: the universal protein knowledgebase. *Nucleic Acids Res*  
833 32:D115-D119.
- 834 77. Rawlings ND, Barrett AJ, Finn R. 2015. Twenty years of the MEROPS database of proteolytic  
835 enzymes, their substrates and inhibitors. *Nucleic Acids Res* 44:D343-D350.
- 836 78. Lombard V, Golaconda Ramulu H, Drula E, Coutinho PM, Henrissat B. 2013. The carbohydrate-  
837 active enzymes database (CAZy) in 2013. *Nucleic acids research* 42:D490-D495.
- 838 79. Shelest E. 2017. Transcription factors in fungi: TFome dynamics, three major families, and dual-  
839 specificity TFs. *Front Genet* 8.
- 840 80. Kurtz S, Phillippy A, Delcher AL, Smoot M, Shumway M, Antonescu C, Salzberg SL. 2004.  
841 Versatile and open software for comparing large genomes. *Genome Biol* 5:R12.
- 842 81. Li H, Handsaker B, Wysoker A, Fennell T, Ruan J, Homer N, Marth G, Abecasis G, Durbin R.  
843 2009. The sequence alignment/map format and SAMtools. *Bioinformatics* 25:2078-2079.
- 844 82. Quinlan AR, Hall IM. 2010. BEDTools: a flexible suite of utilities for comparing genomic  
845 features. *Bioinformatics* 26:841-842.
- 846 83. Garrison E, Marth G. 2012. Haplotype-based variant detection from short-read sequencing. *arXiv*  
847 preprint arXiv:12073907.
- 848 84. Wang K, Li M, Hakonarson H. 2010. ANNOVAR: functional annotation of genetic variants from  
849 high-throughput sequencing data. *Nucleic Acids Res* 38:e164-e164.
- 850 85. Sperschneider J, Williams AH, Hane JK, Singh KB, Taylor JM. 2015. Evaluation of secretion  
851 prediction highlights differing approaches needed for oomycete and fungal effectors. *Front Plant*  
852 *Sci* 6.
- 853 86. Bendtsen JD, Nielsen H, von Heijne G, Brunak S. 2004. Improved prediction of signal peptides:  
854 SignalP 3.0. *J Mol Biol* 340:783-795.
- 855 87. Emanuelsson O, Nielsen H, Brunak S, Von Heijne G. 2000. Predicting subcellular localization of  
856 proteins based on their N-terminal amino acid sequence. *J Mol Biol* 300:1005-1016.
- 857 88. Krogh A, Larsson B, Von Heijne G, Sonnhammer EL. 2001. Predicting transmembrane protein  
858 topology with a hidden Markov model: application to complete genomes. *J Mol Biol* 305:567-  
859 580.
- 860 89. Liao Y, Smyth GK, Shi W. 2013. featureCounts: an efficient general purpose program for  
861 assigning sequence reads to genomic features. *Bioinformatics* 30:923-930.
- 862 90. Love MI, Huber W, Anders S. 2014. Moderated estimation of fold change and dispersion for  
863 RNA-seq data with DESeq2. *Genome Biol* 15:550.
- 864 91. Krzywinski M, Schein J, Birol I, Connors J, Gascoyne R, Horsman D, Jones SJ, Marra MA.  
865 2009. Circos: an information aesthetic for comparative genomics. *Genome Res* 19:1639-1645.
- 866 92. Yu G, Wang L-G, Han Y, He Q-Y. 2012. clusterProfiler: an R package for comparing biological  
867 themes among gene clusters. *OmicS: a journal of integrative biology* 16:284-287.

868

869 **Figure Legends**

870 **Figure 1.** Phenotypic variation of *Pca* isolate virulence and colonization patterns in susceptible  
871 oat.

872 (A) Heatmap showing virulence profiles of 12SD80 and 12NC29 on a set of 40 oat differential  
873 lines. (B) Photographs represent examples of infection types corresponding to full resistance or  
874 intermediate resistance, as well as susceptibility. Scale bar = 0.5 cm. (C) Quantification of  
875 infection structures of *Pca* isolates in the susceptible oat line Marvelous at 1, 2, 5, 6, and 7 dpi.  
876 Graphs show the percentage of urediniospores that have germinated (G), percentage of  
877 germinated spores which formed appressoria (AP), substomatal vesicles or primary infection  
878 hyphae (IH), established colonies (C), and sporulating colonies (SP). Error bars represent  
879 standard errors of three independent replicates.

880 **Figure 2.** Characteristics of haplotig regions in a primary contig for the *Pca* isolate 12SD80.

881 (A) Schematic depicting the first three haplotig regions of the largest primary contig in 12SD80  
882 (000000F). The green circles represent nodes in the assembly graph and the numbers represent  
883 the distance between nodes for the primary contig (upper path, black) and haplotigs (lower path,  
884 red). (B) An IGV genome browser view of the first haplotig associated region of 12SD80 contig  
885 000000F (upper panel) and the corresponding haplotig (lower panel). The top track shows SNPs  
886 and indels between haplotypes. The next track shows the coverage of short-read mapping to the  
887 assembly, and below that is the raw alignment evidence. Uniquely mapping reads are shown in  
888 red (-ve strand orientation) and blue (+ve strand) while grey indicates reads mapping to multiple  
889 locations. Annotated genes and repeats are shown in separate tracks, and the bottom track for the  
890 primary contig shows structural variations (SV). Red asterisks indicate a repeat element that has  
891 undergone a tandem expansion in the haplotig. (C) Density histograms of mean coverage depth  
892 of collapsed and haplotig regions of primary contigs, haplotigs, and primary contigs without  
893 haplotigs in 12SD80.

894 **Figure 3.** Functional annotation of transcription factors, CAZymes, and MEROPS proteases in  
895 *Pca* isolates.

896 (A) Percent of total genes predicted to encode members of various fungal transcription factor

897 classes based on InterProScan annotation. **(B)** Heatmap showing percent of total genes annotated  
898 as members of CAZyme families in the following classes: auxiliary activities (AA),  
899 carbohydrate-binding modules (CBM), carbohydrate esterases (CE), glycoside hydrolases (GH),  
900 glycosyltransferases (GTs), and polysaccharide lyases (PL). Expanded families GH5 and GH47  
901 are indicated. **(C)** Heatmap showing percent of total genes annotated as members of MEROPS  
902 families of aspartic acid (A), cysteine (C), metallo (M), serine (S), and threonine (T) proteases or  
903 peptidase inhibitors (I). Expanded families A01A and S08A are indicated.

904 **Figure 4.** Clustering analysis of predicted secretome gene expression profiles and orthology in  
905 *Pca*.

906 **(A)** *K*-means clustering of secretome genes of 12SD80 and **(B)** 12NC29. Heatmaps show rlog  
907 transformed expression values with dark blue indicating high expression according to the scale.  
908 Cluster numbers are shown outside of the graphs and tracks show gene expression in germinated  
909 spores (GS), isolated haustoria (H), and infected tissues at 2 (2d) and 5 dpi (5d). **(C)** Orthology  
910 relationships between genes in 12SD80 cluster 4 and all 12NC29 clusters are indicated by red  
911 (predicted effectors) and grey (other secreted proteins) lines. **(D-F)** Orthology relationships  
912 between genes in 12NC29 cluster 3 and all 12SD80 clusters **(D)**, 12SD80 cluster 5 and all  
913 12NC29 clusters **(E)**, and 12NC29 cluster 6 and all 12SD80 clusters **(F)**.

914 **Figure 5.** Genomic landscape of predicted *Pca* effectors.

915 Heatmap plots representing the distribution of 5' and 3' intergenic distances for all genes on  
916 primary contigs of **(A)** 12SD80 and **(B)** 12NC29, and haplotigs of **(C)** 12SD80 and **(D)** 12NC29.  
917 Scales representing gene content per bin are shown on the right. Circles indicate predicted  
918 effectors with orthologs (red) or isolate-singletons (white).

919

920 **Table 1.** Assembly metrics and evaluation

|                                     | <u>12SD80 Primary</u><br><u>Contigs</u> | <u>12SD80</u><br><u>Haplotigs</u> | <u>12NC29 Primary</u><br><u>Contigs</u> | <u>12NC29</u><br><u>Haplotigs</u> |
|-------------------------------------|-----------------------------------------|-----------------------------------|-----------------------------------------|-----------------------------------|
| # contigs ( $\geq 0$ bp)            | 603                                     | 1033                              | 777                                     | 950                               |
| # contigs ( $\geq 50000$ bp)        | 475                                     | 372                               | 560                                     | 403                               |
| Total length (Mb)                   | 99.2                                    | 51.3                              | 105.2                                   | 61.0                              |
| Total length $\geq 50000$ bp (Mb)   | 94.9                                    | 36.2                              | 98.0                                    | 49.4                              |
| Largest contig (Mb)                 | 1.39                                    | 0.35                              | 1.19                                    | 0.48                              |
| GC (%)                              | 44.7                                    | 44.9                              | 44.7                                    | 44.9                              |
| N50 (Kb)                            | 268.3                                   | 77.8                              | 217.3                                   | 121.2                             |
| Complete BUSCOs (%)                 | 90.4                                    | 57.9                              | 89.6                                    | 72.1                              |
| Complete and single-copy BUSCOs (%) | 85.9                                    | 57.2                              | 84.1                                    | 69.7                              |
| Complete and duplicated BUSCOs (%)  | 4.5                                     | 0.7                               | 5.5                                     | 2.4                               |
| Fragmented BUSCOs (%)               | 3.1                                     | 3.8                               | 2.8                                     | 4.1                               |
| Missing BUSCOs (%)                  | 6.5                                     | 38.3                              | 7.6                                     | 23.8                              |

921

922

923 **Table 2.** Proportion of repeated sequence content in *Pca* isolates

924

| <b>Repeat Class</b> | <b>12SD80 (%)</b> | <b>12NC29 (%)</b> |
|---------------------|-------------------|-------------------|
| Total               | 52.76             | 53.66             |
| SINEs               | 0.02              | 0.01              |
| LINEs               | 0.84              | 0.95              |
| LTR elements        | 20.10             | 20.18             |
| DNA elements        | 14.50             | 15.56             |
| Unclassified        | 16.02             | 16.24             |
| Small RNA           | 0.05              | 0                 |
| Satellites          | 0.12              | 0.05              |
| Simple repeats      | 1.58              | 1.22              |
| Low complexity      | 0.11              | 0.12              |

925

926

927 **Table 3.** Gene, allele and ortholog content in *Pca* genome assemblies

|                                             | <b><u>12SD80</u></b> | <b><u>12NC29</u></b> |
|---------------------------------------------|----------------------|----------------------|
| Total genes (P and H*)                      | 26,796               | 28,801               |
| Mean gene length (all genes)                | 1,516 bp             | 1,518 bp             |
| % of genome covered by genes                | 27.0                 | 26.3                 |
| Total genes on P                            | 17,248               | 17,865               |
| Total genes on H                            | 9,548                | 10,936               |
| Allele pairs on P and H                     | 6,664                | 7,789                |
| Haplotype-singleton genes on P              | 2,162                | 2,311                |
| Haplotype-singleton genes on H              | 2,033                | 2,154                |
| Effectors on P                              | 529                  | 549                  |
| Effectors on H                              | 320                  | 351                  |
| Effectors on P in allele pairs              | 268                  | 277                  |
| Effectors on H in allele pairs              | 262                  | 276                  |
| Haplotype-singleton effectors on P          | 42                   | 61                   |
| Haplotype-singleton effectors on H          | 49                   | 62                   |
| Orthologous effectors on P between isolates | 336                  | 327                  |
| Isolate singleton effectors on P            | 184                  | 216                  |

928

929 \* P and H represent primary contigs and haplotigs, respectively.

930

931 **Table 4.** Features of proteins encoded by genes in different expression clusters of *Pca*

932

| Clusters      | # proteins | %CAZymes   | %EffectorP  | %NLS (LOCALIZER) | %ApoplastP  |
|---------------|------------|------------|-------------|------------------|-------------|
| <u>12SD80</u> |            |            |             |                  |             |
| 1             | 251        | 18.7       | 37.1        | 20.7             | 23.1        |
| 2             | 78         | 6.7        | 29.5        | 19.2             | 43.6        |
| 3             | 55         | 6.7        | 27.3        | 12.7             | 61.8        |
| <b>4*</b>     | <b>111</b> | <b>2.7</b> | <b>35.1</b> | <b>30.6</b>      | <b>8.1</b>  |
| <b>5*</b>     | <b>173</b> | <b>5.3</b> | <b>36.4</b> | <b>24.9</b>      | <b>16.8</b> |
| 6             | 197        | 36.0       | 20.3        | 18.8             | 30.5        |
| 7             | 198        | 24.0       | 42.9        | 16.7             | 48.0        |
| <u>12NC29</u> |            |            |             |                  |             |
| 1             | 239        | 17.1       | 36.0        | 23.8             | 25.1        |
| 2             | 93         | 14.5       | 33.3        | 30.1             | 30.1        |
| <b>3*</b>     | <b>129</b> | <b>6.6</b> | <b>41.9</b> | <b>19.4</b>      | <b>10.1</b> |
| 4             | 71         | 7.9        | 23.9        | 9.9              | 53.5        |
| 5             | 166        | 19.7       | 24.1        | 22.9             | 28.3        |
| <b>6*</b>     | <b>179</b> | <b>5.3</b> | <b>36.3</b> | <b>27.9</b>      | <b>20.1</b> |
| 7             | 86         | 7.9        | 45.3        | 10.5             | 52.3        |
| 8             | 124        | 13.2       | 29.0        | 18.5             | 37.1        |
| 9             | 60         | 7.9        | 26.7        | 8.3              | 55.0        |

933

934 \* Red indicates haustorially-expressed clusters.

935



936 **Table 5.** Variation rates (variants/kbp) in annotated genes and predicted effectors on primary  
937 contigs in *Pca*.

|                                                  | <u>12SD80</u> | <u>12NC29</u> |
|--------------------------------------------------|---------------|---------------|
| Het. variants for all genes                      | 2.83          | 3.76          |
| Het. variants for effectors                      | 2.86          | 4.55          |
| Nonsyn. het. variants/kbp for all genes          | 0.98          | 1.26          |
| Nonsyn. het. variants/kbp for effectors          | 0.93          | 1.57          |
| Inter-isolate variants for all genes             | 6.37          | 5.01          |
| Inter-isolate variants for all effectors         | 7.39          | 5.88          |
| Inter-isolate variants for orthologous genes     | 6.20          | 4.95          |
| Inter-isolate variants for orthologous effectors | 7.76          | 5.86          |

938

939

940 **Supplemental Material Legends**

941 **Dataset S1-12.** Effector genes on primary contigs and haplotigs with allele pairs for 12SD80 and  
942 12NC29 (Datasets **S1-S4**), singleton-effector genes on primary contigs and haplotigs (Datasets  
943 **S5-S8**), and orthologous and isolate-singleton effectors (Datasets **S9-12**). Asterisks in the  
944 datasets indicate no ortholog in that genome, and commas between gene and contig names within  
945 a genome indicate putative paralogs.

946 **Text S1.** FALCON config file parameters

947 **Table S1.** Summary statistics for SMRT sequencing reads

948

949 **Table S2.** Alignment statistics of RNAseq reads mapping to *Pca* assemblies (primary contigs)

950 GS, 2, 5, and H indicate germinated spores, 2 dpi, 5 dpi, and haustoria samples, respectively. R1,  
951 R2, and R3 designate the different biological replicates.

952 **Table S3.** Non-redundant GO terms present in predicted effectors on primary contigs.

953

954 **Figure S1.** SMRT sequencing output for two *Pca* isolates

955 Length distributions of filtered polymerase reads (**A**) and subreads (**B**) for 12SD80 (top) and  
956 12NC29 (bottom).

957 **Figure S2.** Coverage of 12NC29 and GC content of genome assemblies for each *Pca* isolate

958 (**A**) Density histograms of mean coverage depth of collapsed and haplotig regions of primary  
959 contigs, haplotigs, and primary contigs without haplotigs in 12NC29. (**B**) GC content distribution  
960 of contigs from 12NC29 and 12SD80 assemblies.

961 **Figure S3.** Inter-isolate read mapping coverage of isolate-singleton and orthologous genes

962 Reads from one isolate were mapped to the other isolate to assess coverage of isolate-singleton  
963 and orthologous genes on primary contigs. Density histograms of average coverage depth per  
964 gene for 12SD80 (left) and 12NC29 (right).

965 **Figure S4.** Small sequence variants and structural variation between haplotypes of 12SD80 and  
966 12NC29

967 (**A**) Genome-wide characterization of SNPs and small indels classified by genomic location as

968 intergenic (dark green), 1 kbp downstream (orange) or upstream of a gene (purple), exonic (red)  
969 and intronic (light green) in 12SD80 and 12NC29. **(B)** Structural variation between haplotigs and  
970 primary contigs that overlap with annotated genes. Colors indicate different classes of SV  
971 (shown in the key). **(C)** Distribution of small variants in and around predicted effectors on  
972 primary contigs of 12SD80 and 12NC29. Same key as is shown in **(A)**. **(D)** SV types in predicted  
973 effector genes as in **(B)**.

974 **Figure S5.** GenomeScope analysis of rust species

975 Comparison of 21 *k-mer* profiles of 12SD80, 12NC29, *Melampsora larici-populina*, *Puccinia*  
976 *striiformis*, *Puccinia triticina*, *Melampsora lini*. Overall heterozygosity rate estimates are shown  
977 in each graph.

978 **Figure S6.** Intra-isolate structural variants

979 Graph shows size distribution of structural variants from 50-10,000 bp in haplotigs relative to  
980 primary contigs of **(A)** 12SD80 and **(B)** 12NC29 identified using Assemblytics.

981 **Figure S7.** GO enrichment analysis of secreted proteins

982 Number of genes in enriched GO term classes in the secreted protein sets of 12SD80 and  
983 12NC29. Dot sizes represent the ratio of a given term out of all enriched GO terms, and colors  
984 indicate the adjusted *p*-value according to the scale insets.

985 **Figure S8.** Secretome clustering and orthology between individual 12SD80 clusters and all  
986 12NC29 clusters

987 The heatmaps show rlog transformed expression values for germinated spores (GS), isolated  
988 haustoria (H), and infected tissues at 2 (2d) and 5 dpi (5d) with dark blue indicating high  
989 expression according to the scale inset. Links depict orthology relationships between secretome  
990 genes (grey lines) and effectors (red lines) in all 12NC29 clusters, and 12SD80 clusters **(A)** 1,  
991 **(B)** 2, **(C)** 3, **(D)** 6 and **(E)** 7.

992 **Figure S9.** Secretome clustering and orthology between individual 12NC29 clusters and all  
993 12SD80 clusters

994 The heatmaps show rlog transformed expression values for germinated spores (GS), isolated  
995 haustoria (H), and infected tissues at 2 (2d) and 5 dpi (5d) with dark blue indicating high  
996 expression according to the scale inset. Links depict orthologous relationships between  
997 secretome genes (black lines) and effectors (red lines) in all 12SD80 clusters, and 12NC29  
998 clusters 1 (**A**) 1, (**B**) 2, (**C**) 3, (**D**) 6 and (**E**) 7.

999

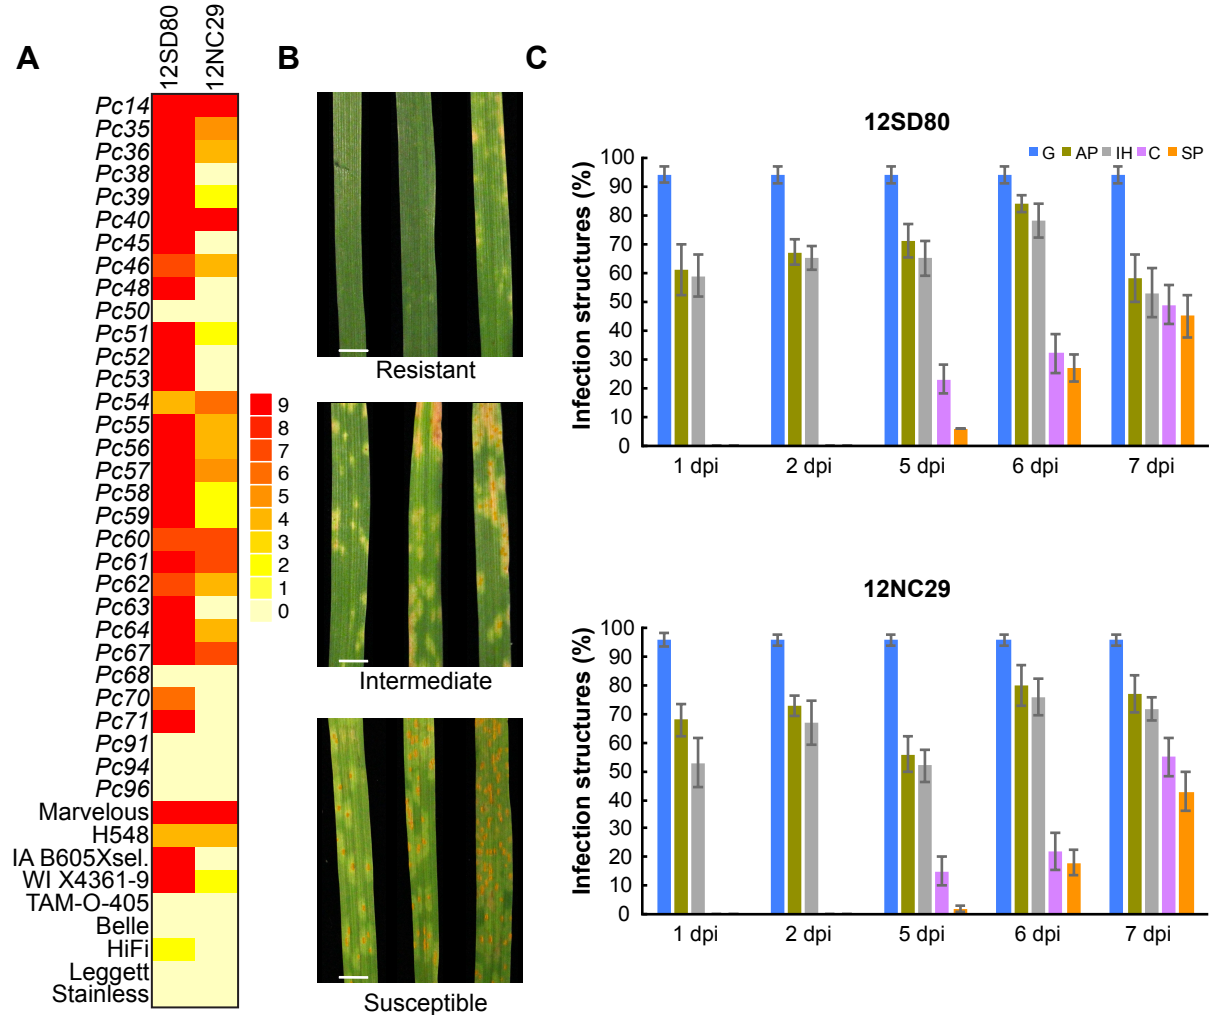

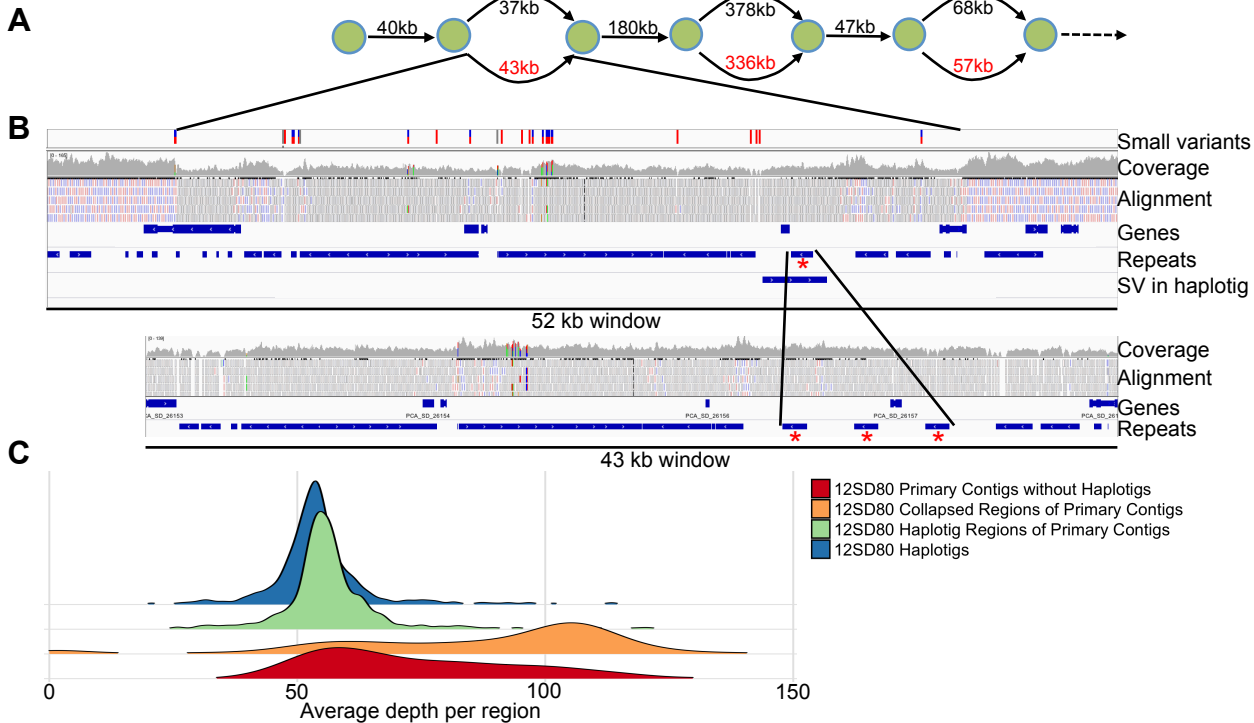

**A**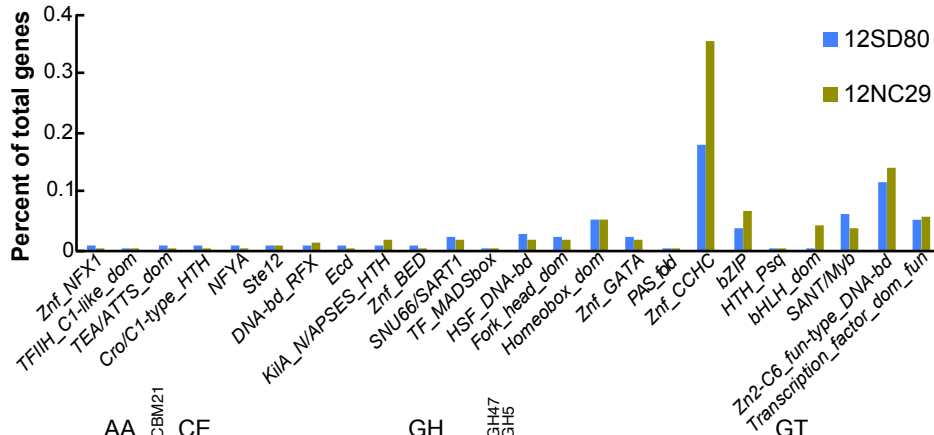**B**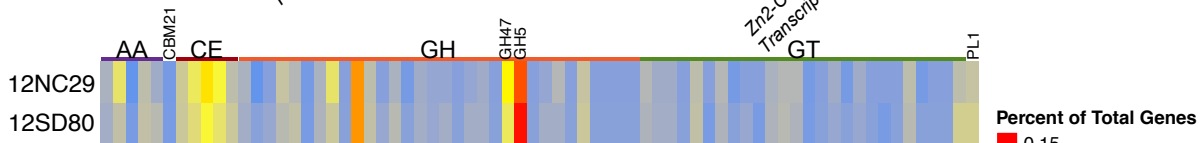**C**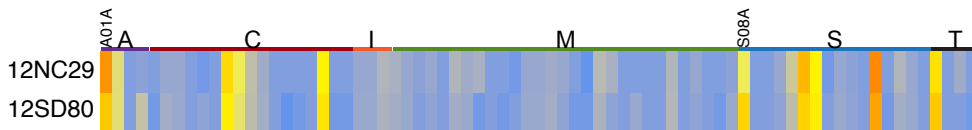

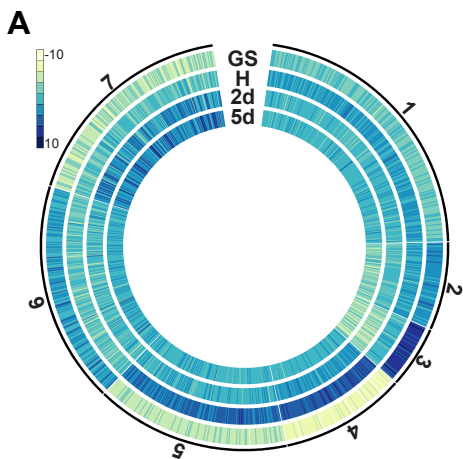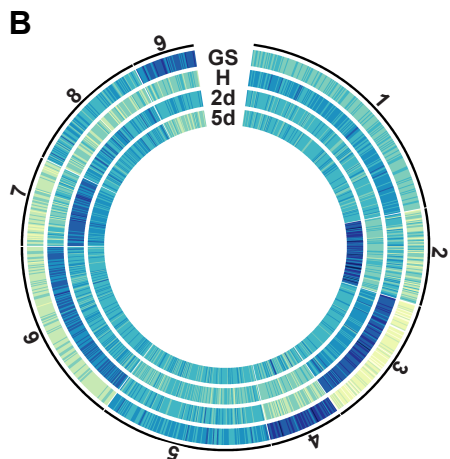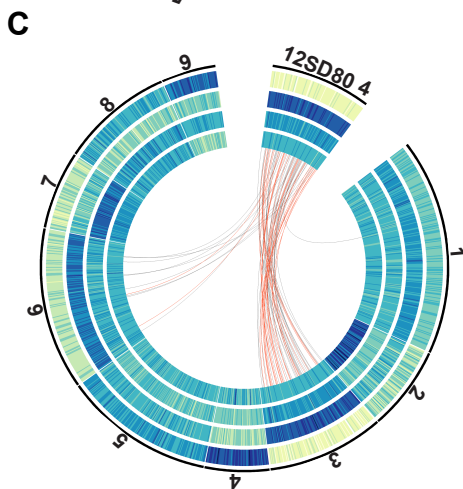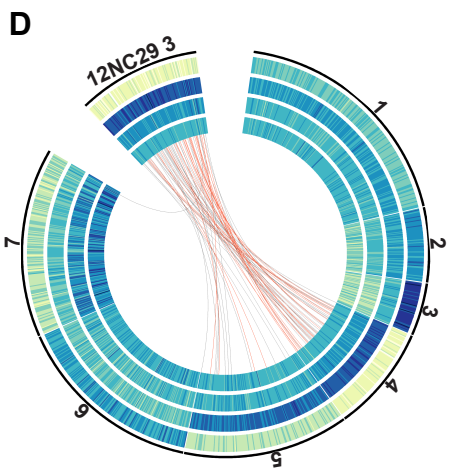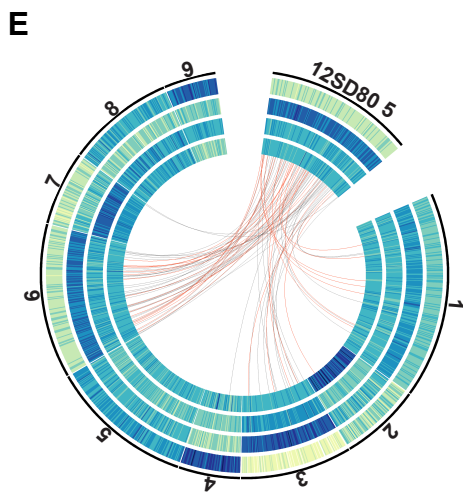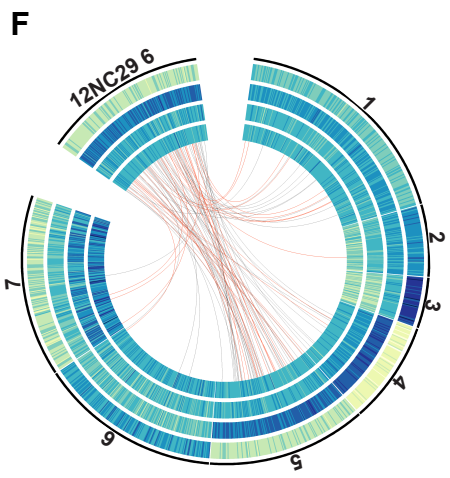



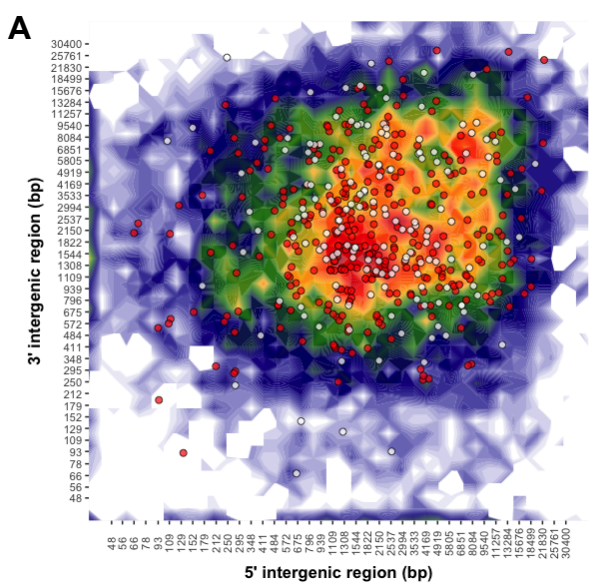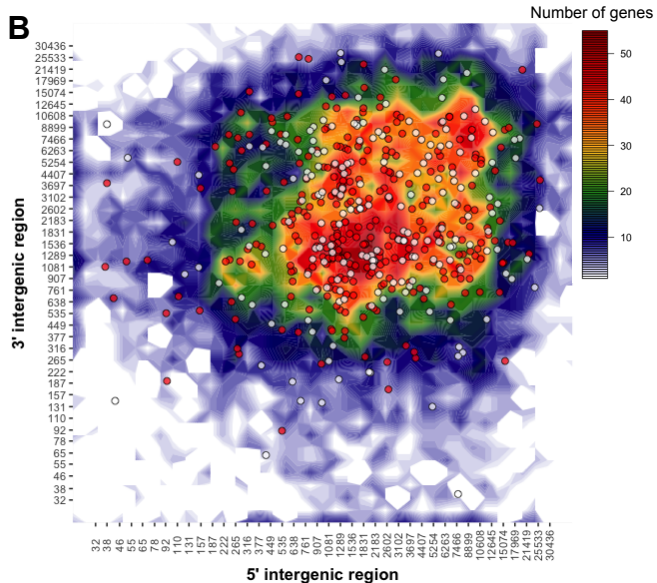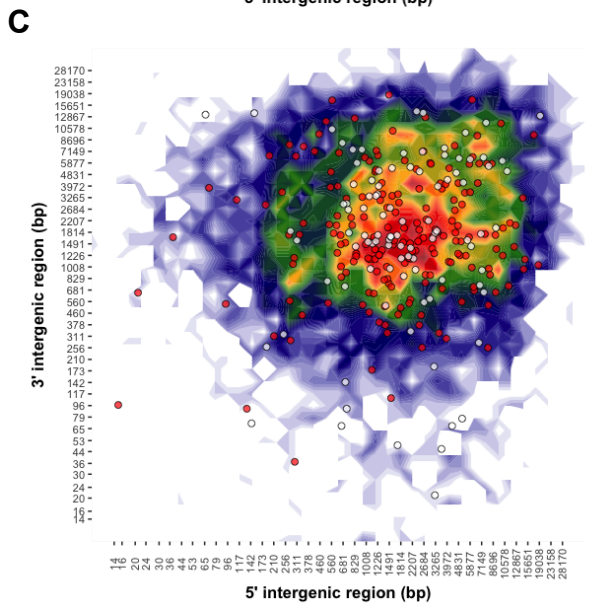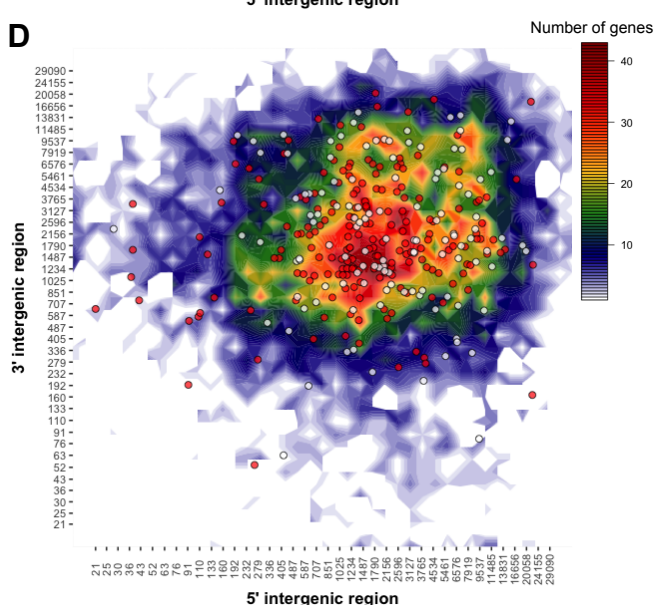

Source: https://www.biorxiv.org/content/10.1101/179226v1.full.pdf
